# Supplementary material for: Molecular Characterization of Circulating Tumor Cells in Human Metastatic Colorectal Cancer
Source: PLoS One. 2012 Jul 10;7(7):e40476. doi: 10.1371/journal.pone.0040476 (PMC3397799; doi:10.1371/journal.pone.0040476)
Supplement: Table S2 — CTC specific genes found by microarray analysis. (XLS) [file pone.0040476.s005.xls]

## Sheet: Hoja1
AGILENT ID	GENE NAME	DESCRIPTION	PATIENT 1 ARRAY SIGNAL	PATIENT 1 RATIO	PATIENT 1 LOG2(RATIO)	PATIENT 2 ARRAY SIGNAL	PATIENT 2 RATIO	PATIENT 2 LOG2(RATIO)	PATIENT 3 ARRAY SIGNAL	PATIENT 3 RATIO	PATIENT 3 LOG2(RATIO)	PATIENT 4 ARRAY SIGNAL	PATIENT 4 RATIO	PATIENT 4 LOG2(RATIO)	PATIENT 5 ARRAY SIGNAL	PATIENT 5 RATIO	PATIENT 5 LOG2(RATIO)	PATIENT 6 ARRAY SIGNAL	PATIENT 6 RATIO	PATIENT 6 LOG2(RATIO)	CONTROL 1 ARRAY SIGNAL	CONTROL 1 RATIO	CONTROL 1 LOG2(RATIO)	CONTROL 2 ARRAY SIGNAL	CONTROL 2 RATIO	CONTROL 2 LOG2(RATIO)	CONTROL 3 ARRAY SIGNAL	CONTROL 3 RATIO	CONTROL 3 LOG2(RATIO)
A_24_P358305	A_24_P358305	Unknown	2995	0.894653	-0.1606	5573	1.66474	0.735298	2974	0.88838	-0.170751	14425	4.30897	2.10734	7708	2.3025	1.2032	57080	17.0507	4.09176	2668	0.796973	-0.327397	5643	1.68565	0.753306	1732	0.517375	-0.950717
A_24_P409824	A_24_P409824	Unknown	1991	1.25089	0.322955	3556	2.23414	1.15972	2351	1.47707	0.562736	10366	6.51267	2.70325	2793	1.75476	0.811277	5330	3.34869	1.7436	1021	0.641466	-0.640555	2093	1.31497	0.395034	1661	1.04356	0.0615138
A_24_P458252	A_24_P458252	Unknown	5662	1.97834	0.984288	14541	5.08071	2.34503	15233	5.3225	2.4121	15935	5.56778	2.4771	8714	3.04472	1.60631	25562	8.93152	3.15891	3059	1.06883	0.0960364	3489	1.21908	0.28579	2038	0.712089	-0.48987
A_33_P3219105	A_33_P3219105	Unknown	10660	1.42355	0.509491	11352	1.51596	0.60023	9935	1.32673	0.407875	19050	2.54396	1.34707	18935	2.5286	1.33834	41713	5.5704	2.47778	5343	0.71351	-0.486995	5447	0.727398	-0.459183	11675	1.55909	0.640706
A_33_P3227731	A_33_P3227731	Unknown	4798	0.969946	-0.0440235	15549	3.14333	1.65229	6295	1.27257	0.34775	38757	7.83497	2.96993	8861	1.79131	0.841013	68698	13.8877	3.79574	6505	1.31503	0.395092	5893	1.19131	0.252546	2442	0.493666	-1.01839
A_33_P3336038	A_33_P3336038	Unknown	29630	0.770311	-0.376488	27146	0.705732	-0.502807	25939	0.674353	-0.568423	119336	3.10246	1.63341	122479	3.18417	1.67092	90292	2.34738	1.23105	42921	1.11585	0.158137	45801	1.19072	0.251833	26673	0.693436	-0.528166
A_33_P3390753	A_33_P3390753	Unknown	894	1.05507	0.0773452	2041	2.40873	1.26827	1701	2.00747	1.00538	2796	3.29976	1.72236	3044	3.59245	1.84497	3962	4.67585	2.22523	236	0.278521	-1.84414	1054	1.2439	0.314873	1252	1.47758	0.563233
A_33_P3412556	A_33_P3412556	Unknown	2147	0.664569	-0.58951	3001	0.92891	-0.106389	3210	0.993603	-0.00925861	12304	3.8085	1.92922	5461	1.69036	0.757333	9023	2.79292	1.48178	4247	1.31459	0.394612	2886	0.893314	-0.162761	2559	0.792097	-0.336252
A_33_P3298024	ABCC3	Homo sapiens ATP-binding cassette, sub-family C (CFTR/MRP), member 3 (ABCC3), transcript variant 2, mRNA [NM_001144070]	916	1.79491	0.843908	2905	5.69236	2.50903	1810	3.5467	1.82648	5723	11.2142	3.48726	1597	3.12933	1.64585	21664	42.4507	5.40772	359	0.703462	-0.507456	409	0.801437	-0.319339	763	1.4951	0.580243
A_33_P3298062	ABCC5	Homo sapiens ATP-binding cassette, sub-family C (CFTR/MRP), member 5 (ABCC5), transcript variant 2, mRNA [NM_001023587]	783	1.16808	0.224134	587	0.875684	-0.191518	885	1.32024	0.400799	2976	4.43958	2.15042	2201	3.28344	1.71521	1470	2.19294	1.13287	410	0.611636	-0.709255	1088	1.62307	0.698728	513	0.765291	-0.38592
A_23_P395172	ABHD2	Homo sapiens abhydrolase domain containing 2 (ABHD2), transcript variant 1, mRNA [NM_007011]	878	1.31175	0.391496	1206	1.80179	0.849433	552	0.824701	-0.278057	2146	3.20618	1.68085	4649	6.94572	2.79612	1406	2.1006	1.0708	399	0.596116	-0.746336	458	0.684263	-0.547377	1151	1.71962	0.782091
A_33_P3388651	ABLIM1	Homo sapiens actin binding LIM protein 1 (ABLIM1), transcript variant 3, mRNA [NM_001003408]	771	0.715877	-0.482215	2776	2.57753	1.36599	989	0.918292	-0.122976	2759	2.56175	1.35713	2057	1.90994	0.933524	7604	7.06035	2.81974	1514	1.40576	0.491347	1260	1.16992	0.226405	457	0.424327	-1.23675
A_24_P123408	ABLIM3	Homo sapiens actin binding LIM protein family, member 3 (ABLIM3), mRNA [NM_014945]	971	3.72506	1.89727	3596	13.7954	3.78612	2025	7.76854	2.95764	3525	13.523	3.75735	1887	7.23913	2.85582	15142	58.0895	5.86021	336	1.289	0.366255	215	0.824808	-0.277869	231	0.886189	-0.174313
A_33_P3396370	ACRBP	Homo sapiens acrosin binding protein (ACRBP), mRNA [NM_032489]	14112	3.56634	1.83444	20691	5.22896	2.38652	18863	4.767	2.25308	54115	13.6758	3.77355	10148	2.56457	1.35872	83788	21.1746	4.40426	4009	1.01314	0.0188354	5126	1.29543	0.373426	2736	0.691433	-0.532339
A_23_P105957	ACTN1	Homo sapiens actinin, alpha 1 (ACTN1), transcript variant 2, mRNA [NM_001102]	8114	1.17362	0.230962	12923	1.8692	0.902418	10110	1.46232	0.54826	18695	2.70406	1.43513	49424	7.14874	2.83769	60789	8.79258	3.13629	2300	0.332674	-1.58782	4443	0.64264	-0.637917	13998	2.02469	1.0177
A_24_P303594	ACTR3B	Homo sapiens ARP3 actin-related protein 3 homolog B (yeast) (ACTR3B), transcript variant 2, mRNA [NM_001040135]	1092	1.48101	0.566584	2079	2.81962	1.4955	1507	2.04385	1.03129	4329	5.87116	2.55364	1308	1.77396	0.826974	2150	2.91591	1.54395	1342	1.82007	0.863996	476	0.64557	-0.631355	394	0.534358	-0.904121
A_23_P46627	ADIPOR1	Homo sapiens adiponectin receptor 1 (ADIPOR1), transcript variant 1, mRNA [NM_015999]	3145	1.08611	0.119164	5025	1.73535	0.795228	3650	1.2605	0.334001	14979	5.1729	2.37097	10570	3.65028	1.86801	33020	11.4032	3.51137	2754	0.951076	-0.072367	4105	1.41764	0.503487	1828	0.631288	-0.663629
A_33_P3420486	AK025118	Homo sapiens cDNA: FLJ21465 fis, clone COL04784. [AK025118]	1125	1.4313	0.517324	717	0.912214	-0.132556	2398	3.05089	1.60923	5821	7.40585	2.88867	2036	2.59033	1.37314	34895	44.3957	5.47235	684	0.870229	-0.200533	1120	1.42494	0.510898	554	0.704835	-0.504643
A_23_P217088	AK1	Homo sapiens adenylate kinase 1 (AK1), mRNA [NM_000476]	528	0.544143	-0.877943	931	0.959464	-0.0596993	774	0.797664	-0.326147	3237	3.33597	1.73811	1811	1.86637	0.900234	2598	2.67743	1.42085	740	0.762625	-0.390955	1296	1.33562	0.417513	875	0.901752	-0.149197
A_23_P428827	AKIRIN2	Homo sapiens akirin 2 (AKIRIN2), mRNA [NM_018064]	1386	1.3344	0.416195	2443	2.35205	1.23392	1392	1.34018	0.422426	4876	4.69448	2.23097	6364	6.12709	2.6152	6103	5.8758	2.55479	583	0.561297	-0.833165	774	0.745186	-0.424327	1759	1.69352	0.760023
A_33_P3395369	AMD1	Homo sapiens adenosylmethionine decarboxylase 1 (AMD1), transcript variant 1, mRNA [NM_001634]	3711	1.49176	0.577015	3268	1.31368	0.393615	3247	1.30524	0.384314	7685	3.08924	1.62725	3903	1.56894	0.64979	5138	2.06539	1.04641	1215	0.488409	-1.03384	3134	1.25982	0.333212	3114	1.25178	0.323976
A_23_P216108	ANK1	Homo sapiens ankyrin 1, erythrocytic (ANK1), transcript variant 3, mRNA [NM_000037]	1541	0.463738	-1.10862	2686	0.808306	-0.307027	1585	0.476979	-1.068	3168	0.953355	-0.068914	916	0.275655	-1.85907	10014	3.01354	1.59146	781	0.235029	-2.08909	8413	2.53175	1.34013	775	0.233223	-2.10022
A_33_P3296479	APP	Homo sapiens amyloid beta (A4) precursor protein (APP), transcript variant 3, mRNA [NM_201414]	4137	1.85599	0.892188	7911	3.54913	1.82746	5601	2.51279	1.32929	19024	8.53477	3.09335	7083	3.17766	1.66796	38184	17.1306	4.0985	1739	0.78017	-0.358139	2618	1.17452	0.232068	2330	1.04531	0.0639333
A_24_P41864	ARHGAP6	Homo sapiens Rho GTPase activating protein 6 (ARHGAP6), transcript variant 3, mRNA [NM_006125]	1895	3.91529	1.96912	4805	9.92769	3.31146	2680	5.53719	2.46915	8326	17.2025	4.10454	1893	3.91116	1.9676	12057	24.9112	4.63872	479	0.989669	-0.0149814	574	1.18595	0.246044	399	0.82438	-0.278618
A_24_P257348	ARL6IP5	Homo sapiens ADP-ribosylation-like factor 6 interacting protein 5 (ARL6IP5), mRNA [NM_006407]	6429	0.918604	-0.122486	6768	0.967041	-0.0483505	5752	0.821871	-0.283016	22420	3.20347	1.67963	10299	1.47157	0.557352	27838	3.97761	1.9919	6643	0.949181	-0.0752452	8792	1.25624	0.329111	5561	0.79458	-0.331736
A_23_P62351	ARMCX6	Homo sapiens armadillo repeat containing, X-linked 6 (ARMCX6), transcript variant 1, mRNA [NM_019007]	727	1.21437	0.280202	1910	3.19042	1.67375	2454	4.09911	2.03531	8017	13.3914	3.74324	1579	2.63753	1.39919	6770	11.3085	3.49933	549	0.917038	-0.124947	460	0.768374	-0.380119	787	1.31459	0.394611
A_33_P3279765	ATP5E	ATP synthase, H+ transporting, mitochondrial F1 complex, epsilon subunit [Source:HGNC Symbol;Acc:838] [ENST00000395663]	9379	4.67936	2.22631	24431	12.1891	3.60752	19378	9.66805	3.27323	53478	26.6812	4.73775	12388	6.18061	2.62775	107577	53.6722	5.7461	1507	0.751871	-0.411443	2241	1.11808	0.16102	2265	1.13005	0.176389
A_33_P3346806	AX747590	Sequence 1115 from Patent EP1308459. [AX747590]	1191	0.461747	-1.11482	1541	0.597441	-0.743131	1705	0.661024	-0.597226	12156	4.71285	2.2366	6507	2.52274	1.33499	2516	0.975446	-0.0358663	4640	1.79891	0.847127	2039	0.790514	-0.339136	1059	0.410571	-1.2843
A_23_P210886	BCL2L1	Homo sapiens BCL2-like 1 (BCL2L1), nuclear gene encoding mitochondrial protein, transcript variant 1, mRNA [NM_138578]	1764	1.56522	0.646363	3371	2.99113	1.58069	1986	1.7622	0.817378	6908	6.12955	2.61578	2495	2.21384	1.14655	12990	11.5262	3.52684	1501	1.33185	0.413436	1211	1.07453	0.103711	669	0.593611	-0.752409
A_33_P3322539	BEND2	Homo sapiens BEN domain containing 2, mRNA (cDNA clone MGC:104533 IMAGE:4830576), complete cds. [BC096745]	583	0.719753	-0.474426	3222	3.97778	1.99196	1799	2.22099	1.1512	4223	5.21358	2.38227	1571	1.93951	0.955689	11296	13.9457	3.80175	671	0.828395	-0.271609	1293	1.5963	0.674728	466	0.575309	-0.797592
A_24_P269432	BET1	Homo sapiens blocked early in transport 1 homolog (S. cerevisiae) (BET1), mRNA [NM_005868]	570	1.11546	0.157639	1404	2.74755	1.45815	750	1.46771	0.553567	1725	3.37573	1.7552	493	0.964775	-0.0517356	1543	3.01957	1.59434	280	0.547945	-0.867896	912	1.78474	0.835711	341	0.667319	-0.583552
A_24_P40551	BEX4	Homo sapiens brain expressed, X-linked 4 (BEX4), mRNA [NM_001127688]	617	0.997306	-0.00389182	1414	2.28556	1.19255	693	1.12015	0.163693	2863	4.62769	2.21029	876	1.41595	0.501769	2045	3.3055	1.72487	435	0.703125	-0.508147	641	1.0361	0.0511621	780	1.26078	0.334312
A_23_P19624	BMP6	Homo sapiens bone morphogenetic protein 6 (BMP6), mRNA [NM_001718]	1239	1.05897	0.0826677	3549	3.03333	1.6009	1963	1.67778	0.746552	8859	7.57179	2.92064	2288	1.95556	0.967579	23187	19.8179	4.30874	1830	1.5641	0.645335	804	0.687179	-0.541241	876	0.748718	-0.417506
A_23_P154643	BMP7	Homo sapiens bone morphogenetic protein 7 (BMP7), mRNA [NM_001719]	380	0.783505	-0.351985	1016	2.09485	1.06684	783	1.61443	0.691028	2319	4.78144	2.25745	618	1.27423	0.349622	984	2.02887	1.02067	640	1.31959	0.400087	436	0.898969	-0.153657	379	0.781443	-0.355787
A_24_P32887	BRD3	Homo sapiens bromodomain containing 3 (BRD3), mRNA [NM_007371]	1440	1.19107	0.252255	1540	1.27378	0.349116	1349	1.1158	0.158076	2988	2.47146	1.30537	2089	1.72787	0.788998	4838	4.00165	2.0006	1081	0.894127	-0.161448	1021	0.8445	-0.243831	1525	1.26137	0.334995
A_24_P244442	BSCL2	Homo sapiens Berardinelli-Seip congenital lipodystrophy 2 (seipin) (BSCL2), transcript variant 2, mRNA [NM_032667]	1591	1.36294	0.446717	2242	1.92062	0.94157	1137	0.974015	-0.0379843	4766	4.08281	2.02956	2354	2.01656	1.0119	10877	9.31782	3.21999	1032	0.884066	-0.177774	1083	0.927756	-0.108183	1387	1.18818	0.248751
A_23_P2114	C11orf59	Homo sapiens chromosome 11 open reading frame 59 (C11orf59), mRNA [NM_017907]	1731	1.62892	0.703917	1348	1.26851	0.343131	1103	1.03795	0.0537437	4176	3.92974	1.97443	2456	2.31117	1.20862	6988	6.57591	2.71719	783	0.736826	-0.440605	1201	1.13018	0.176547	1204	1.133	0.180146
A_32_P163089	C12orf75	Homo sapiens chromosome 12 open reading frame 75 (C12orf75), mRNA [NM_001145199]	1457	3.6304	1.86013	9422	23.4767	4.55316	5480	13.6545	3.7713	54217	135.092	7.0778	9235	23.0108	4.52424	33518	83.5166	6.38399	199	0.495847	-1.01203	701	1.74668	0.804613	304	0.757475	-0.40073
A_23_P410312	C12orf76	Homo sapiens chromosome 12 open reading frame 76 (C12orf76), mRNA [NM_207435]	2554	1.6428	0.716153	5058	3.25343	1.70196	2207	1.4196	0.505481	39734	25.5579	4.6757	4448	2.86106	1.51655	18839	12.1177	3.59905	2358	1.51672	0.600958	1079	0.694039	-0.52691	1227	0.789237	-0.34147
A_24_P10137	C13orf15	Homo sapiens chromosome 13 open reading frame 15 (C13orf15), mRNA [NM_014059]	909	1.43375	0.519797	2059	3.24763	1.69939	1600	2.52366	1.33552	2639	4.16246	2.05744	1322	2.08517	1.06017	1951	3.07729	1.62166	835	1.31703	0.397293	632	0.996845	-0.00455828	435	0.68612	-0.543467
A_33_P3289780	C14orf2	Homo sapiens chromosome 14 open reading frame 2 (C14orf2), transcript variant 2, mRNA [NM_001127393]	2869	1.01774	0.0253645	3934	1.39553	0.480813	1894	0.671869	-0.573747	8852	3.14012	1.65082	6089	2.15999	1.11102	11967	4.24512	2.08581	2481	0.880099	-0.184262	2825	1.00213	0.00306739	3151	1.11777	0.160626
A_23_P106544	C16orf61	Homo sapiens chromosome 16 open reading frame 61 (C16orf61), mRNA [NM_020188]	518	1.48	0.565597	1771	5.06	2.33914	323	0.922857	-0.115821	6360	18.1714	4.1836	1076	3.07429	1.62025	1922	5.49143	2.45718	253	0.722857	-0.468218	491	1.40286	0.488368	306	0.874286	-0.193823
A_23_P15285	C16orf68	Homo sapiens chromosome 16 open reading frame 68 (C16orf68), mRNA [NM_024109]	3847	1.16788	0.223893	11713	3.55586	1.8302	7409	2.24924	1.16944	23038	6.99393	2.8061	5733	1.74044	0.79945	12501	3.79508	1.92413	5215	1.58318	0.662827	1963	0.595932	-0.74678	2704	0.820886	-0.284745
A_32_P42574	C1orf198	Homo sapiens chromosome 1 open reading frame 198 (C1orf198), transcript variant 1, mRNA [NM_032800]	562	1.36297	0.446759	1957	4.74616	2.24676	1211	2.93694	1.55432	5219	12.6572	3.66189	1607	3.89733	1.96249	10811	26.2191	4.71255	440	1.0671	0.0936924	527	1.27809	0.353992	270	0.65481	-0.610852
A_23_P17130	C2orf88	Homo sapiens chromosome 2 open reading frame 88 (C2orf88), transcript variant 1, mRNA [NM_001042519]	2528	3.56894	1.8355	8377	11.8264	3.56393	4939	6.97271	2.80172	15397	21.7369	4.44208	1978	2.79247	1.48154	15092	21.3064	4.41321	430	0.607059	-0.720092	1211	1.70965	0.773699	484	0.683294	-0.549421
A_33_P3353360	C3orf10	Homo sapiens cDNA FLJ76545 complete cds, highly similar to Homo sapiens uncharacterized hematopoietic stem/progenitor cells protein MDS027 mRNA. [AK290580]	1935	0.9476	-0.0776493	8269	4.04946	2.01773	3110	1.52302	0.606932	18172	8.89912	3.15366	4483	2.1954	1.13448	12594	6.16748	2.62468	1545	0.756611	-0.402376	2728	1.33595	0.417861	1853	0.907444	-0.14012
A_23_P414273	C5orf62	Homo sapiens chromosome 5 open reading frame 62 (C5orf62), mRNA [NM_032947]	1698	2.11985	1.08396	2347	2.93009	1.55094	1138	1.42072	0.506626	9414	11.7528	3.55493	4945	6.17353	2.6261	20123	25.1223	4.6509	600	0.749064	-0.41684	1160	1.44819	0.534251	643	0.802747	-0.316984
A_32_P168349	C6orf25	Protein G6b Precursor [Source:UniProtKB/Swiss-Prot;Acc:O95866] [ENST00000383412]	10404	3.2543	1.70235	23940	7.48827	2.90463	25793	8.06788	3.01219	58441	18.2799	4.19219	17592	5.50266	2.46013	103361	32.3306	5.01483	3998	1.25055	0.32256	2659	0.831717	-0.265835	2934	0.917735	-0.12385
A_33_P3333863	C7orf28A	Homo sapiens chromosome 7 open reading frame 28A (C7orf28A), mRNA [NM_015622]	1621	0.912725	-0.131747	2611	1.47016	0.555971	2296	1.29279	0.370491	4153	2.3384	1.22552	3681	2.07264	1.05147	2028	1.14189	0.191426	991	0.557995	-0.841675	2001	1.12669	0.17209	2336	1.31532	0.395409
A_32_P100439	C7orf41	Homo sapiens chromosome 7 open reading frame 41 (C7orf41), mRNA [NM_152793]	5555	2.07741	1.05479	10346	3.86911	1.952	11064	4.13762	2.0488	35767	13.3758	3.74156	10202	3.81526	1.93178	80825	30.2263	4.91773	2622	0.980553	-0.0283318	2932	1.09648	0.132886	2468	0.922962	-0.115657
A_24_P380679	C7orf53	Homo sapiens chromosome 7 open reading frame 53 (C7orf53), transcript variant 1, mRNA [NM_182597]	998	1.24594	0.317238	6610	8.25218	3.04478	2835	3.53933	1.82347	38442	47.9925	5.58474	7090	8.85144	3.14591	11072	13.8227	3.78897	1008	1.25843	0.331621	390	0.486891	-1.03833	1005	1.25468	0.327321
A_23_P158053	C9orf16	Homo sapiens chromosome 9 open reading frame 16 (C9orf16), mRNA [NM_024112]	6034	2.14835	1.10323	10919	3.88761	1.95888	10177	3.62343	1.85736	41266	14.6924	3.877	6951	2.47484	1.30734	47561	16.9337	4.08182	1782	0.634465	-0.656388	4190	1.49181	0.577065	2454	0.873724	-0.19475
A_23_P146367	C9orf89	Homo sapiens chromosome 9 open reading frame 89 (C9orf89), mRNA [NM_032310]	4086	1.55224	0.634347	6191	2.35191	1.23383	4344	1.65025	0.722682	13387	5.0856	2.34642	8583	3.26061	1.70514	22694	8.62125	3.1079	2354	0.894264	-0.161228	2335	0.887046	-0.17292	3208	1.21869	0.285332
A_23_P8913	CA2	Homo sapiens carbonic anhydrase II (CA2), mRNA [NM_000067]	2899	2.29351	1.19756	4393	3.47547	1.79721	8811	6.97073	2.80131	44848	35.481	5.14898	1169	0.924842	-0.112722	14356	11.3576	3.50559	1199	0.948576	-0.0761648	1975	1.5625	0.643856	618	0.488924	-1.03232
A_24_P219785	CALM3	Homo sapiens calmodulin 3 (phosphorylase kinase, delta) (CALM3), mRNA [NM_005184]	6377	1.9924	0.994505	19313	6.03406	2.59313	16823	5.25609	2.39399	56679	17.7085	4.14637	11872	3.70923	1.89112	74224	23.1902	4.53544	2219	0.693293	-0.528463	2269	0.708915	-0.496316	5114	1.59779	0.67608
A_23_P393080	CALML3	Homo sapiens calmodulin-like 3 (CALML3), mRNA [NM_005185]	1574	1.33428	0.416056	5733	4.85985	2.28091	4803	4.07149	2.02556	20377	17.2735	4.11049	4032	3.41791	1.77312	36968	31.3377	4.96983	865	0.733258	-0.447607	1282	1.08675	0.120017	1392	1.17999	0.23878
A_32_P224666	CAPZA2	Homo sapiens capping protein (actin filament) muscle Z-line, alpha 2 (CAPZA2), mRNA [NM_006136]	528	1.20273	0.266317	679	1.5467	0.629191	470	1.07062	0.0984398	2700	6.15034	2.62067	2470	5.62642	2.49222	2360	5.37585	2.42649	249	0.567198	-0.818075	170	0.387244	-1.36869	898	2.04556	1.03249
A_33_P3385842	CCDC7	Homo sapiens coiled-coil domain containing 7 (CCDC7), transcript variant 1, mRNA [NM_145023]	3333	2.15868	1.11015	6002	3.88731	1.95877	5839	3.78174	1.91905	8543	5.53303	2.46807	2542	1.64637	0.719291	2714	1.75777	0.813748	664	0.430052	-1.21742	3163	2.04858	1.03462	805	0.521373	-0.939612
A_33_P3324086	CCDC90A	Homo sapiens coiled-coil domain containing 90A (CCDC90A), mRNA [NM_001031713]	1360	2.45931	1.29826	2416	4.3689	2.12727	2135	3.86076	1.94888	9412	17.0199	4.08915	2286	4.13382	2.04747	10150	18.3544	4.19806	574	1.03797	0.0537713	668	1.20796	0.272569	417	0.754069	-0.407232
A_23_P98900	CCDC92	Homo sapiens coiled-coil domain containing 92 (CCDC92), mRNA [NM_025140]	2049	0.85948	-0.218464	5831	2.44589	1.29036	5628	2.36074	1.23924	12767	5.35529	2.42096	4251	1.78314	0.834418	19409	8.14136	3.02527	2589	1.08599	0.119011	3105	1.30243	0.381209	1458	0.611577	-0.709394
A_23_P152838	CCL5	Homo sapiens chemokine (C-C motif) ligand 5 (CCL5), mRNA [NM_002985]	60739	1.62209	0.69785	125126	3.34159	1.74054	82595	2.20577	1.14128	198751	5.30781	2.40812	88417	2.36125	1.23955	205327	5.48343	2.45508	35594	0.950567	-0.073139	46573	1.24377	0.314721	30168	0.805662	-0.311754
A_23_P361773	CCND3	Homo sapiens cyclin D3 (CCND3), transcript variant 2, mRNA [NM_001760]	1785	1.51058	0.595101	1817	1.53766	0.620735	1376	1.16446	0.219657	4496	3.8048	1.92782	4381	3.70748	1.89044	13646	11.5481	3.52958	645	0.545839	-0.873452	1644	1.39126	0.476387	1256	1.06291	0.0880133
A_33_P3229196	CD151	Homo sapiens CD151 molecule (Raph blood group) (CD151), transcript variant 1, mRNA [NM_004357]	7674	1.40045	0.485891	11501	2.09885	1.0696	3318	0.605511	-0.723774	25649	4.68076	2.22674	12951	2.36346	1.2409	52558	9.59146	3.26175	8594	1.56834	0.649242	4197	0.765923	-0.38473	3648	0.665734	-0.586982
A_24_P362193	CD84	Homo sapiens CD84 molecule (CD84), mRNA [NM_003874]	2200	1.69014	0.757143	3258	2.50294	1.32363	2905	2.23175	1.15818	6292	4.8338	2.27316	1657	1.27298	0.348214	5897	4.53035	2.17962	833	0.639949	-0.643972	1858	1.4274	0.51339	1214	0.93265	-0.100592
A_23_P76364	CD9	Homo sapiens CD9 molecule (CD9), mRNA [NM_001769]	9936	4.50612	2.17189	10194	4.62313	2.20887	11260	5.10658	2.35236	17824	8.08345	3.01497	12624	5.72517	2.51732	42797	19.4091	4.27866	1575	0.714286	-0.485427	3269	1.48254	0.568071	1771	0.803175	-0.316214
A_24_P70993	CD99	Homo sapiens CD99 molecule (CD99), transcript variant 1, mRNA [NM_002414]	3391	2.16631	1.11524	8030	5.1299	2.35893	5634	3.59923	1.84769	28312	18.0869	4.17687	3731	2.38352	1.25309	32961	21.0569	4.39622	1070	0.68356	-0.548859	2308	1.47445	0.560173	1318	0.841993	-0.24812
A_33_P3309034	CDC10L	Homo sapiens CDC10 cell division cycle 10 homolog (S. cerevisiae)-like (CDC10L), non-coding RNA [NR_027269]	1893	0.95046	-0.0733018	3441	1.7277	0.788852	2157	1.08301	0.11505	12215	6.13305	2.61661	4502	2.26042	1.17659	5622	2.82276	1.49711	1637	0.821925	-0.282922	2759	1.38527	0.470169	1579	0.792803	-0.334965
A_33_P3231557	CDC14B	Homo sapiens CDC14 cell division cycle 14 homolog B (S. cerevisiae) (CDC14B), transcript variant 1, mRNA [NM_003671]	1776	4.06718	2.02403	4038	9.24733	3.20904	4341	9.94122	3.31342	9354	21.4214	4.42098	2398	5.4916	2.45723	8862	20.2947	4.34303	434	0.993893	-0.00883736	336	0.769466	-0.378071	540	1.23664	0.306427
A_23_P139486	CDK2AP1	Homo sapiens cyclin-dependent kinase 2 associated protein 1 (CDK2AP1), mRNA [NM_004642]	7276	1.24227	0.312984	13147	2.24466	1.1665	10927	1.86563	0.899664	51515	8.79546	3.13676	10771	1.839	0.878918	54253	9.26293	3.21147	7460	1.27369	0.349014	4311	0.736042	-0.442139	5800	0.990268	-0.014109
A_33_P3389060	CDK5RAP2	Homo sapiens CDK5 regulatory subunit associated protein 2 (CDK5RAP2), transcript variant 1, mRNA [NM_018249]	1054	2.4119	1.27017	1354	3.0984	1.63152	1062	2.43021	1.28108	2075	4.74828	2.24741	8047	18.4142	4.20275	7077	16.1945	4.01743	310	0.709382	-0.495365	580	1.32723	0.40842	421	0.963387	-0.053813
A_23_P73493	CETN2	Homo sapiens centrin, EF-hand protein, 2 (CETN2), mRNA [NM_004344]	307	0.605523	-0.723747	1643	3.24063	1.69627	644	1.27022	0.345075	4577	9.02761	3.17434	1698	3.34911	1.74378	4488	8.85207	3.14602	420	0.828402	-0.271596	312	0.615385	-0.70044	789	1.55621	0.63804
A_23_P92025	CIDEC	Homo sapiens cell death-inducing DFFA-like effector c (CIDEC), mRNA [NM_022094]	476	0.794658	-0.331594	967	1.61436	0.69096	1027	1.71452	0.777808	1923	3.21035	1.68273	1177	1.96494	0.974486	1825	3.04674	1.60727	780	1.30217	0.380918	435	0.72621	-0.461541	582	0.971619	-0.0415368
A_24_P484797	CIDECP	Homo sapiens cell death-inducing DFFA-like effector c pseudogene (CIDECP), non-coding RNA [NR_002786]	580	1.52231	0.606262	490	1.28609	0.362991	527	1.3832	0.468012	1388	3.64304	1.86514	643	1.68766	0.755028	977	2.5643	1.35857	388	1.01837	0.0262657	285	0.748031	-0.418829	470	1.2336	0.30287
A_23_P124476	CLCN3	Homo sapiens chloride channel 3 (CLCN3), transcript variant e, mRNA [NM_173872]	904	1.97812	0.984129	1381	3.02188	1.59545	930	2.03501	1.02504	1731	3.78775	1.92134	912	1.99562	0.99684	7147	15.6389	3.96707	304	0.665208	-0.588123	463	1.01313	0.018818	604	1.32166	0.402354
A_33_P3236071	CLEC1B	Homo sapiens C-type lectin domain family 1, member B (CLEC1B), transcript variant 1, mRNA [NM_016509]	1833	5.27229	2.39843	1810	5.20614	2.38021	2318	6.66731	2.7371	7837	22.5417	4.49452	1624	4.67114	2.22377	11470	32.9914	5.04402	342	0.983701	-0.0237084	298	0.857143	-0.222392	403	1.15916	0.213075
A_33_P3373364	CLIC4	Homo sapiens chloride intracellular channel 4 (CLIC4), nuclear gene encoding mitochondrial protein, mRNA [NM_013943]	1276	1.37352	0.457878	2182	2.34876	1.2319	1807	1.9451	0.959846	4380	4.71475	2.23718	1662	1.78902	0.83917	7304	7.86222	2.97494	817	0.87944	-0.185343	838	0.902045	-0.148728	1132	1.21851	0.285123
A_23_P215913	CLU	Homo sapiens clusterin (CLU), transcript variant 2, mRNA [NM_203339]	7041	5.88057	2.55596	19748	16.4933	4.04381	16937	14.1456	3.82228	43288	36.1537	5.17607	10677	8.91732	3.15661	98515	82.2787	6.36245	815	0.680679	-0.554953	1216	1.01559	0.0223184	1561	1.30373	0.382646
A_33_P3281567	CMAH	Homo sapiens cytidine monophosphate-N-acetylneuraminic acid hydroxylase (CMP-N-acetylneuraminate monooxygenase) pseudogene (CMAH), transcript variant 1, non-coding RNA [NR_002174]	1034	2.32186	1.21528	2657	5.96632	2.57684	1742	3.91168	1.96779	4990	11.2051	3.48608	722	1.62126	0.697113	2383	5.35105	2.41982	458	1.02844	0.040462	239	0.536677	-0.897875	639	1.43488	0.52093
A_23_P371239	CMIP	Homo sapiens c-Maf-inducing protein (CMIP), transcript variant C-mip, mRNA [NM_198390]	2411	1.47282	0.558577	3156	1.92792	0.947043	1810	1.10568	0.144935	7025	4.29139	2.10144	4600	2.81002	1.49058	22509	13.7502	3.78138	615	0.375687	-1.4124	2165	1.32254	0.403313	2131	1.30177	0.380476
A_33_P3317988	CMPK1	Homo sapiens cytidine monophosphate (UMP-CMP) kinase 1, cytosolic (CMPK1), transcript variant 1, mRNA [NM_016308]	2024	3.53434	1.82144	4511	7.87718	2.97768	2463	4.30093	2.10465	5753	10.046	3.32855	1503	2.62456	1.39208	3444	6.01397	2.58832	547	0.95518	-0.0661548	454	0.792782	-0.335003	717	1.25204	0.324277
A_33_P3376379	CNST	Homo sapiens consortin, connexin sorting protein (CNST), transcript variant 2, mRNA [NM_001139459]	4046	2.79742	1.4841	8695	6.01175	2.58779	5333	3.68726	1.88255	13603	9.40516	3.23345	1768	1.2224	0.289718	11289	7.80525	2.96445	1334	0.922332	-0.116641	1271	0.878774	-0.186436	1734	1.19889	0.261704
A_24_P251534	CTDSPL	Homo sapiens CTD (carboxy-terminal domain, RNA polymerase II, polypeptide A) small phosphatase-like (CTDSPL), transcript variant 1, mRNA [NM_001008392]	1247	2.26453	1.17921	3197	5.80569	2.53747	1311	2.38075	1.25142	12983	23.5769	4.5593	3257	5.91465	2.56429	23954	43.5	5.44294	1094	1.98668	0.990362	362	0.657385	-0.60519	196	0.355932	-1.49033
A_33_P3283900	CTNS	Homo sapiens cystinosis, nephropathic (CTNS), transcript variant 2, mRNA [NM_004937]	1484	1.18059	0.239506	2910	2.31504	1.21103	1461	1.16229	0.216972	15699	12.4893	3.64262	5243	4.17104	2.06041	11688	9.29833	3.21697	1300	1.03421	0.048527	955	0.759745	-0.396412	1516	1.20605	0.270285
A_33_P3280213	CTSA	Homo sapiens cathepsin A (CTSA), transcript variant 2, mRNA [NM_001127695]	19161	1.6831	0.751123	33476	2.94053	1.55608	28018	2.4611	1.2993	91120	8.00398	3.00072	76605	6.72898	2.75039	171104	15.0298	3.90975	12654	1.11153	0.152544	7252	0.637016	-0.650599	14247	1.25146	0.323608
A_33_P3310780	CTTN	Homo sapiens cortactin (CTTN), transcript variant 1, mRNA [NM_005231]	1292	1.99383	0.99554	4005	6.18056	2.62774	2364	3.64815	1.86716	8473	13.0756	3.70881	3219	4.96759	2.31255	64892	100.142	6.6459	947	1.46142	0.547371	313	0.483025	-1.04983	684	1.05556	0.0780025
A_24_P277367	CXCL5	Homo sapiens chemokine (C-X-C motif) ligand 5 (CXCL5), mRNA [NM_002994]	910	0.772059	-0.373217	2372	2.01244	1.00895	1400	1.18778	0.248271	2623	2.2254	1.15406	1917	1.62641	0.701695	6797	5.76669	2.52774	706	0.598982	-0.739416	2081	1.76555	0.820121	749	0.635464	-0.654118
A_33_P3375859	CXCR2P	Homo sapiens chemokine (C-X-C motif) receptor 2 pseudogene (CXCR2P), non-coding RNA [NR_002712]	6842	1.71522	0.778391	13004	3.25996	1.70486	10126	2.53848	1.34397	48473	12.1517	3.60308	13655	3.42316	1.77533	47988	12.0301	3.58857	4466	1.11958	0.162956	1863	0.467034	-1.0984	5638	1.41339	0.499156
A_24_P100277	CYB5R3	Homo sapiens cytochrome b5 reductase 3 (CYB5R3), transcript variant 2, mRNA [NM_007326]	3986	1.26046	0.333952	10109	3.19669	1.67658	8397	2.65532	1.40888	29032	9.18056	3.19858	8717	2.75651	1.46284	62690	19.824	4.30917	2683	0.848424	-0.237142	3622	1.14536	0.195797	3182	1.00622	0.00894439
A_33_P3327192	DA142060	DA142060 BRALZ2 Homo sapiens cDNA clone BRALZ2017105 5, mRNA sequence [DA142060]	2622	1.96111	0.971668	6530	4.88407	2.28808	3101	2.31937	1.21373	5610	4.19596	2.069	2002	1.49738	0.582443	10030	7.50187	2.90725	1842	1.37771	0.462274	1000	0.747943	-0.418999	1169	0.874346	-0.193725
A_33_P3338928	DAB2	Homo sapiens disabled homolog 2, mitogen-responsive phosphoprotein (Drosophila) (DAB2), mRNA [NM_001343]	893	1.36893	0.453051	2582	3.9581	1.98481	1761	2.69954	1.43271	4049	6.20695	2.63388	1005	1.54062	0.623514	9905	15.184	3.92448	1123	1.72151	0.783677	399	0.61165	-0.709221	435	0.666837	-0.584594
A_23_P106056	DAD1	Homo sapiens defender against cell death 1 (DAD1), mRNA [NM_001344]	11408	1.72257	0.784562	9643	1.45606	0.54207	9063	1.36848	0.452576	32823	4.95616	2.30922	8881	1.341	0.42331	17929	2.70722	1.43681	4775	0.721009	-0.471912	9509	1.43583	0.521881	5584	0.843165	-0.246113
A_23_P74716	DEDD	Homo sapiens death effector domain containing (DEDD), transcript variant 1, mRNA [NM_032998]	2177	0.710509	-0.493075	3296	1.07572	0.1053	1615	0.527089	-0.923882	6052	1.9752	0.981996	5928	1.93473	0.952129	8742	2.85313	1.51255	1785	0.582572	-0.779492	5178	1.68995	0.756979	2229	0.72748	-0.45902
A_23_P201605	DENND1B	Homo sapiens DENN/MADD domain containing 1B (DENND1B), transcript variant 2, mRNA [NM_144977]	578	1.36535	0.449275	1201	2.83701	1.50437	695	1.64173	0.715219	944	2.22992	1.15699	943	2.22756	1.15546	818	1.93228	0.950307	321	0.758268	-0.399221	481	1.13622	0.184243	468	1.10551	0.144714
A_23_P385063	DNAJB6	Homo sapiens DnaJ (Hsp40) homolog, subfamily B, member 6 (DNAJB6), transcript variant 1, mRNA [NM_058246]	1568	1.53725	0.620356	2243	2.19902	1.13686	1399	1.37157	0.455827	4378	4.29216	2.1017	2635	2.58333	1.36923	6558	6.42941	2.68469	442	0.433333	-1.20645	1362	1.33529	0.417158	1256	1.23137	0.300267
A_33_P3264364	DNM3	Homo sapiens dynamin 3 (DNM3), transcript variant 2, mRNA [NM_001136127]	7033	5.07798	2.34425	17044	12.3061	3.62131	14461	10.4412	3.38421	31052	22.4202	4.48673	4741	3.4231	1.77531	19356	13.9755	3.80482	1374	0.992058	-0.011504	1557	1.12419	0.168883	1224	0.883755	-0.178282
A_24_P143440	DYNLRB1	Homo sapiens dynein, light chain, roadblock-type 1 (DYNLRB1), mRNA [NM_014183]	44176	1.27497	0.350463	66566	1.92117	0.941986	46045	1.32891	0.410245	156552	4.51827	2.17577	59951	1.73025	0.790984	128011	3.69454	1.8854	26482	0.764301	-0.387788	46191	1.33312	0.414812	31273	0.902574	-0.147882
A_23_P79251	EHD3	Homo sapiens EH-domain containing 3 (EHD3), mRNA [NM_014600]	797	0.762193	-0.391771	3224	3.0832	1.62443	2064	1.97386	0.98102	3815	3.64839	1.86726	1748	1.67166	0.741282	21625	20.6806	4.37021	792	0.757412	-0.400851	1937	1.85241	0.889401	408	0.390182	-1.35778
A_23_P251173	EIF2AK1	Homo sapiens eukaryotic translation initiation factor 2-alpha kinase 1 (EIF2AK1), transcript variant 1, mRNA [NM_014413]	6169	1.92521	0.945012	16271	5.07781	2.34421	8369	2.61178	1.38503	47055	14.6848	3.87625	9200	2.87111	1.52161	51080	15.9409	3.99466	4338	1.35379	0.437006	2054	0.641007	-0.641588	3221	1.0052	0.00748443
A_24_P383850	EIF4G3	Homo sapiens eukaryotic translation initiation factor 4 gamma, 3 (EIF4G3), mRNA [NM_003760]	2000	1.61638	0.692766	3998	3.23114	1.69204	3265	2.63874	1.39985	7614	6.15356	2.62142	2887	2.33324	1.22234	6322	5.10938	2.35315	719	0.581088	-0.783171	1819	1.4701	0.555911	1174	0.948815	-0.0758018
A_33_P3364338	ENST00000341355	Putative uncharacterized protein ENSP00000344361 Fragment [Source:UniProtKB/TrEMBL;Acc:A6NNR4] [ENST00000341355]	1296	1.38265	0.467432	4265	4.55014	2.18591	1442	1.53841	0.621437	6625	7.06792	2.82129	1603	1.71017	0.77414	6324	6.7468	2.7542	895	0.954836	-0.0666745	921	0.982575	-0.025361	996	1.06259	0.0875836
A_33_P3253214	ENST00000369159	histone cluster 2, H2aa4 [Source:HGNC Symbol;Acc:29668] [ENST00000369159]	13256	2.08329	1.05887	13606	2.1383	1.09646	9650	1.51658	0.600822	33431	5.25397	2.39341	41948	6.59249	2.72082	80975	12.7259	3.6697	2253	0.354078	-1.49786	4115	0.646708	-0.628815	12721	1.99921	0.999433
A_33_P3258274	ENST00000374896	tissue factor pathway inhibitor (lipoprotein-associated coagulation inhibitor) [Source:HGNC Symbol;Acc:11760] [ENST00000374896]	1076	2.25262	1.1716	2410	5.04536	2.33496	1830	3.83112	1.93777	8292	17.3594	4.11764	1295	2.7111	1.43888	12941	27.0921	4.7598	360	0.753664	-0.408007	618	1.29379	0.371603	455	0.952547	-0.0701377
A_24_P221960	ENST00000391684	Unknown	836	1.04283	0.0605005	1240	1.54678	0.629266	918	1.14511	0.195492	4445	5.5447	2.47111	1156	1.442	0.528067	2890	3.60499	1.85	691	0.861954	-0.214317	1008	1.25738	0.330421	706	0.880665	-0.183334
A_33_P3286481	ENST00000398711	Putative uncharacterized protein ENSP00000381697 [Source:UniProtKB/TrEMBL;Acc:A8MZ30] [ENST00000398711]	57529	1.0412	0.0582453	49616	0.897984	-0.155239	57421	1.03924	0.0555344	198142	3.58611	1.84242	141673	2.56409	1.35845	216396	3.91648	1.96956	44982	0.814115	-0.296696	51391	0.930109	-0.104528	69385	1.25578	0.32858
A_33_P3303250	ENST00000451205	CDNA FLJ26691 fis, clone MPG07564 [Source:UniProtKB/TrEMBL;Acc:Q6ZP22] [ENST00000451205]	413	1.38127	0.465996	837	2.79933	1.48508	830	2.77592	1.47297	1342	4.48829	2.16617	572	1.91304	0.93587	1681	5.62207	2.4911	441	1.47492	0.560633	208	0.695652	-0.523562	248	0.829431	-0.269805
A_33_P3381870	EPB49	Homo sapiens erythrocyte membrane protein band 4.9 (dematin) (EPB49), transcript variant 1, mRNA [NM_001978]	6727	2.92605	1.54896	14586	6.3445	2.66551	9800	4.26272	2.09178	38727	16.8452	4.07426	7346	3.1953	1.67595	83400	36.2766	5.18097	4432	1.92779	0.946951	1498	0.651588	-0.617969	967	0.420618	-1.24942
A_23_P47410	ESAM	Homo sapiens endothelial cell adhesion molecule (ESAM), mRNA [NM_138961]	1810	1.80219	0.849752	5269	5.24627	2.39129	2467	2.45636	1.29652	7799	7.76535	2.95705	1906	1.89778	0.92431	17844	17.767	4.15113	1707	1.69963	0.765225	639	0.636243	-0.65235	667	0.664122	-0.59048
A_32_P119616	ETFA	Homo sapiens electron-transfer-flavoprotein, alpha polypeptide (ETFA), nuclear gene encoding mitochondrial protein, transcript variant 1, mRNA [NM_000126]	4956	1.6657	0.736125	20074	6.74681	2.7542	13003	4.37027	2.12772	29784	10.0103	3.32341	5799	1.94903	0.962753	24074	8.09119	3.01635	1742	0.585481	-0.772307	3382	1.13668	0.184825	3802	1.27784	0.353707
A_23_P35591	EXOSC1	Homo sapiens exosome component 1 (EXOSC1), mRNA [NM_016046]	1376	0.890999	-0.166504	2105	1.36305	0.446836	1887	1.22189	0.28911	6049	3.9169	1.96971	2924	1.89337	0.920959	2006	1.29894	0.377337	1574	1.01921	0.0274514	1195	0.773797	-0.369974	1864	1.20699	0.271418
A_32_P140139	F13A1	Homo sapiens coagulation factor XIII, A1 polypeptide (F13A1), mRNA [NM_000129]	7146	2.89039	1.53126	14944	6.04449	2.59562	15205	6.15006	2.6206	38830	15.7058	3.97323	13338	5.3949	2.4316	73270	29.636	4.88928	1864	0.753944	-0.407471	3286	1.32911	0.410459	2267	0.916948	-0.125089
A_33_P3212274	F2R	Homo sapiens coagulation factor II (thrombin) receptor, mRNA (cDNA clone IMAGE:4849569), with apparent retained intron. [BC016059]	445	0.853581	-0.228401	739	1.41752	0.503368	543	1.04156	0.0587461	1741	3.33951	1.73964	790	1.51535	0.599647	3643	6.98785	2.80485	677	1.29859	0.37695	666	1.27749	0.353316	221	0.423913	-1.23816
A_23_P129221	FAH	Homo sapiens fumarylacetoacetate hydrolase (fumarylacetoacetase) (FAH), mRNA [NM_000137]	621	0.868937	-0.202677	1212	1.6959	0.762047	962	1.34608	0.428766	3213	4.4958	2.16858	1499	2.09748	1.06866	5697	7.97155	2.99486	984	1.37687	0.461388	608	0.850746	-0.233199	552	0.772388	-0.372602
A_23_P160849	FCER1G	Homo sapiens Fc fragment of IgE, high affinity I, receptor for; gamma polypeptide (FCER1G), mRNA [NM_004106]	29038	0.703593	-0.507186	21208	0.513872	-0.96052	25348	0.614184	-0.703256	122819	2.97592	1.57333	153945	3.7301	1.89921	102278	2.47821	1.3093	54052	1.30968	0.38922	35977	0.871726	-0.198054	33784	0.818589	-0.288788
A_23_P64044	FERMT3	Homo sapiens fermitin family homolog 3 (Drosophila) (FERMT3), transcript variant URP2LF, mRNA [NM_178443]	3361	1.14359	0.193565	4507	1.53351	0.616842	2773	0.943518	-0.0838777	7445	2.53317	1.34095	7269	2.47329	1.30643	33911	11.5383	3.52836	1915	0.651582	-0.617981	4153	1.41307	0.498829	2749	0.935352	-0.0964185
A_24_P158946	FGD4	Homo sapiens FYVE, RhoGEF and PH domain containing 4 (FGD4), mRNA [NM_139241]	1961	1.45763	0.543626	2341	1.74009	0.799161	2071	1.5394	0.622364	3131	2.3273	1.21866	5101	3.79163	1.92282	1732	1.28741	0.364475	1620	1.20416	0.26803	363	0.269822	-1.88992	2053	1.52602	0.60977
A_33_P3849275	FHL1	Homo sapiens four and a half LIM domains 1 (FHL1), transcript variant 4, mRNA [NM_001159704]	373	1.27886	0.354855	1741	5.96914	2.57752	992	3.40114	1.76602	6568	22.5189	4.49306	1692	5.80114	2.53634	12296	42.1577	5.39772	391	1.34057	0.422848	253	0.867429	-0.205183	231	0.792	-0.336428
A_24_P160001	FKBP1A	Homo sapiens FK506 binding protein 1A, 12kDa (FKBP1A), transcript variant 12A, mRNA [NM_054014]	7470	1.11117	0.152075	7708	1.14657	0.197323	7078	1.05286	0.0743081	17359	2.58216	1.36858	15543	2.31203	1.20916	30148	4.48453	2.16496	7260	1.07993	0.110936	5691	0.846539	-0.240351	7217	1.07353	0.102366
A_23_P142631	FKBP1B	Homo sapiens FK506 binding protein 1B, 12.6 kDa (FKBP1B), transcript variant 2, mRNA [NM_054033]	1884	1.20898	0.273795	6991	4.4862	2.16549	7337	4.70824	2.23519	16708	10.7217	3.42246	4283	2.74845	1.45862	20464	13.132	3.71501	2360	1.51444	0.598783	796	0.510802	-0.969164	1519	0.974759	-0.036882
A_33_P3887888	FLJ44511	Homo sapiens cDNA FLJ44511 fis, clone UTERU3001766. [AK126475]	1999	6.39339	2.67658	5322	17.0213	4.08927	4104	13.1258	3.71433	5435	17.3827	4.11958	841	2.68977	1.42748	8220	26.29	4.71644	192	0.614072	-0.703519	441	1.41045	0.496153	305	0.97548	-0.0358162
A_33_P3253249	FTH1	Homo sapiens ferritin, heavy polypeptide 1 (FTH1), mRNA [NM_002032]	51662	0.809859	-0.304257	40505	0.634961	-0.65526	36475	0.571786	-0.806452	169078	2.65049	1.40626	165874	2.60026	1.37866	136617	2.14162	1.0987	72444	1.13564	0.183506	64869	1.01689	0.0241688	54061	0.847466	-0.238772
A_24_P356338	GABARAPL2	Homo sapiens GABA(A) receptor-associated protein-like 2 (GABARAPL2), mRNA [NM_007285]	2127	0.784581	-0.350005	5517	2.03504	1.02506	3326	1.22685	0.294963	16644	6.13943	2.61811	8854	3.26595	1.7075	10366	3.82368	1.93496	1402	0.517152	-0.951339	4022	1.48359	0.569088	2709	0.999262	-0.00106472
A_33_P3418597	GAS2L1	Homo sapiens growth arrest-specific 2 like 1 (GAS2L1), transcript variant 3, mRNA [NM_152237]	713	0.956191	-0.0646288	1145	1.53554	0.618745	867	1.16272	0.217501	3151	4.22575	2.07921	1043	1.39875	0.484136	6100	8.1806	3.03221	1365	1.83058	0.872298	374	0.501565	-0.995493	498	0.667859	-0.582385
A_33_P3423874	GCOM1	Homo sapiens GRINL1A complex locus (GCOM1), transcript variant 12, mRNA [NM_001018100]	4628	11.599	3.53593	5424	13.594	3.7649	1578	3.95489	1.98364	9250	23.183	4.53499	1716	4.30075	2.10459	42921	107.571	6.74915	454	1.13784	0.186304	423	1.06015	0.0842689	320	0.802005	-0.318317
A_23_P216845	GFI1B	Homo sapiens growth factor independent 1B transcription repressor (GFI1B), transcript variant 1, mRNA [NM_004188]	2420	3.05556	1.61143	7791	9.83712	3.29824	4741	5.98611	2.58162	9780	12.3485	3.62626	2471	3.11995	1.64152	29190	36.8561	5.20383	1481	1.86995	0.902999	372	0.469697	-1.0902	523	0.660354	-0.598689
A_23_P45475	GLA	Homo sapiens galactosidase, alpha (GLA), mRNA [NM_000169]	4191	1.34026	0.422515	9450	3.02207	1.59554	4498	1.43844	0.524504	14844	4.74704	2.24703	5612	1.79469	0.843736	22754	7.27662	2.86327	3308	1.05788	0.08118	2155	0.689159	-0.537091	3918	1.25296	0.325338
A_24_P277657	GMPR	Homo sapiens guanosine monophosphate reductase (GMPR), mRNA [NM_006877]	3613	3.82463	1.93532	8191	8.67078	3.11616	5314	5.62526	2.49192	18739	19.8366	4.31009	4325	4.57833	2.19482	30769	32.5713	5.02553	1377	1.45766	0.543651	421	0.44566	-1.16599	1036	1.09668	0.133147
A_24_P418809	GNAS	Homo sapiens GNAS complex locus (GNAS), transcript variant 7, mRNA [NM_001077489]	18067	1.11986	0.163312	24728	1.53273	0.616101	24154	1.49715	0.582218	85075	5.27324	2.39869	57736	3.57868	1.83943	125528	7.78066	2.95989	14650	0.908058	-0.139144	18475	1.14514	0.19553	15275	0.946798	-0.0788722
A_23_P416581	GNAZ	Homo sapiens guanine nucleotide binding protein (G protein), alpha z polypeptide (GNAZ), mRNA [NM_002073]	3950	1.24619	0.317522	7521	2.3728	1.24659	7691	2.42644	1.27884	14896	4.69955	2.23252	4509	1.42255	0.508476	49152	15.507	3.95485	4005	1.26354	0.337471	4144	1.30739	0.386693	1360	0.429067	-1.22072
A_23_P111701	GNG11	Homo sapiens guanine nucleotide binding protein (G protein), gamma 11 (GNG11), mRNA [NM_004126]	1937	1.788	0.838347	6622	6.11262	2.61179	8116	7.49169	2.90529	20033	18.492	4.20883	3980	3.67385	1.87729	65875	60.8077	5.92618	485	0.447692	-1.15942	2324	2.14523	1.10113	441	0.407077	-1.29663
A_24_P79070	GNG8	Homo sapiens guanine nucleotide binding protein (G protein), gamma 8 (GNG8), mRNA [NM_033258]	6441	3.32182	1.73197	13509	6.96699	2.80054	7045	3.63332	1.86129	36251	18.6957	4.22464	2738	1.41207	0.49781	8415	4.33987	2.11765	2371	1.2228	0.290183	2575	1.328	0.40926	871	0.449201	-1.15457
A_33_P3369419	GON4L	Homo sapiens gon-4-like (C. elegans) (GON4L), transcript variant 2, mRNA [NM_032292]	1472	0.718399	-0.477142	2698	1.31674	0.39697	1726	0.842362	-0.247488	5449	2.65935	1.41107	4954	2.41776	1.27367	2787	1.36018	0.443793	1284	0.626647	-0.674275	3130	1.52757	0.611243	1733	0.845778	-0.241648
A_33_P3461416	GP6	Homo sapiens glycoprotein VI (platelet) (GP6), transcript variant 1, mRNA [NM_001083899]	2103	5.67867	2.50555	5202	14.0468	3.81217	1879	5.07381	2.34307	10825	29.2304	4.8694	2322	6.27003	2.64847	51894	140.128	7.1306	420	1.13411	0.181565	270	0.729073	-0.455865	421	1.13681	0.184996
A_33_P3239849	GPX1	Homo sapiens glutathione peroxidase 1 (GPX1), transcript variant 2, mRNA [NM_201397]	39768	1.85154	0.888726	27980	1.30271	0.381514	24639	1.14716	0.198062	73660	3.4295	1.778	51406	2.39339	1.25905	155895	7.25824	2.85962	17862	0.831629	-0.265988	17243	0.802809	-0.316871	29330	1.36556	0.449495
A_24_P10884	GRAP2	Homo sapiens GRB2-related adaptor protein 2 (GRAP2), mRNA [NM_004810]	10950	3.34624	1.74254	23532	7.1912	2.84623	21379	6.53326	2.7078	60503	18.4893	4.20862	16275	4.97352	2.31427	84105	25.7018	4.6838	3796	1.16003	0.21416	3570	1.09096	0.125604	2451	0.749007	-0.416949
A_23_P154526	GRB14	Homo sapiens growth factor receptor-bound protein 14 (GRB14), mRNA [NM_004490]	319	0.857527	-0.221746	1792	4.8172	2.2682	641	1.72312	0.785022	3319	8.92204	3.15737	681	1.83065	0.872352	2860	7.68817	2.94264	416	1.11828	0.161281	504	1.35484	0.438121	196	0.526882	-0.924449
A_24_P298013	GTPBP2	Homo sapiens GTP binding protein 2 (GTPBP2), mRNA [NM_019096]	1647	1.4701	0.555913	3003	2.68045	1.42248	1145	1.02202	0.0314196	4104	3.6632	1.8731	2762	2.46534	1.30179	7433	6.63463	2.73002	644	0.574829	-0.798795	1151	1.02737	0.0389598	1566	1.3978	0.483156
A_23_P69573	GUCY1A3	Homo sapiens guanylate cyclase 1, soluble, alpha 3 (GUCY1A3), transcript variant 1, mRNA [NM_000856]	857	0.634188	-0.657016	3403	2.51825	1.33242	2379	1.76048	0.815972	6535	4.83596	2.2738	2712	2.00691	1.00497	15418	11.4095	3.51216	2570	1.90183	0.927385	477	0.352985	-1.50232	1007	0.74519	-0.42432
A_33_P3232552	GUCY1B3	Homo sapiens guanylate cyclase 1, soluble, beta 3 (GUCY1B3), mRNA [NM_000857]	884	2.83333	1.5025	2131	6.83013	2.77191	928	2.97436	1.57258	3844	12.3205	3.62299	1187	3.80449	1.9277	12066	38.6731	5.27326	221	0.708333	-0.4975	340	1.08974	0.123989	375	1.20192	0.265345
A_23_P204277	H2AFJ	Homo sapiens H2A histone family, member J (H2AFJ), transcript variant 1, mRNA [NM_177925]	2977	2.40145	1.26391	3917	3.15972	1.6598	1972	1.59075	0.669707	11171	9.01129	3.17173	2977	2.40145	1.26391	15482	12.4888	3.64257	1485	1.1979	0.260511	818	0.659855	-0.599779	1416	1.14224	0.191869
A_23_P23141	H3F3A	Homo sapiens H3 histone, family 3A (H3F3A), mRNA [NM_002107]	98660	1.05261	0.0739647	76372	0.814814	-0.295457	66662	0.711218	-0.491636	196059	2.09176	1.06472	172550	1.84094	0.880442	225686	2.40785	1.26774	74132	0.790916	-0.338404	108657	1.15926	0.213209	98399	1.04982	0.070143
A_33_P3281036	HCG11	Homo sapiens HLA complex group 11 (HCG11), non-coding RNA [NR_026790]	1907	0.759458	-0.396957	2645	1.05337	0.0750057	2707	1.07806	0.108433	8798	3.50378	1.80891	3373	1.34329	0.42577	16653	6.63202	2.72945	3386	1.34847	0.43132	2767	1.10195	0.140061	1380	0.549582	-0.863594
A_33_P3235400	HDGF	Homo sapiens hepatoma-derived growth factor (high-mobility group protein 1-like) (HDGF), transcript variant 1, mRNA [NM_004494]	1271	1.3613	0.444985	2461	2.63584	1.39827	1513	1.62049	0.696433	3841	4.11389	2.0405	1919	2.05534	1.03938	6996	7.49304	2.90555	1404	1.50375	0.588563	499	0.534452	-0.903868	898	0.961799	-0.0561921
A_33_P3223121	HIPK2	Homo sapiens homeodomain interacting protein kinase 2 (HIPK2), transcript variant 2, mRNA [NM_001113239]	9272	1.53892	0.621919	10715	1.77842	0.830599	10055	1.66888	0.73888	25760	4.27552	2.0961	15535	2.57842	1.36649	22882	3.79784	1.92518	6173	1.02456	0.0350106	6420	1.06556	0.0916121	5482	0.909876	-0.136259
A_23_P355439	HIST1H2AA	Homo sapiens histone cluster 1, H2aa (HIST1H2AA), mRNA [NM_170745]	10668	1.47443	0.560158	15892	2.19644	1.13517	13210	1.82576	0.868499	36037	4.9807	2.31635	25918	3.58214	1.84082	54758	7.56814	2.91994	7051	0.974523	-0.0372316	7729	1.06823	0.0952223	6926	0.957247	-0.0630371
A_23_P372860	HIST1H2AC	Homo sapiens histone cluster 1, H2ac (HIST1H2AC), mRNA [NM_003512]	20845	1.47732	0.562983	31039	2.19979	1.13736	24487	1.73544	0.795298	76823	5.44458	2.44482	13420	0.951099	-0.0723333	180622	12.801	3.67818	7960	0.564139	-0.825878	26483	1.8769	0.908349	7887	0.558965	-0.839169
A_23_P428184	HIST1H2AD	Homo sapiens histone cluster 1, H2ad (HIST1H2AD), mRNA [NM_021065]	37936	1.55844	0.6401	30005	1.23263	0.301735	24257	0.996494	-0.00506633	68683	2.82155	1.49649	57477	2.3612	1.23952	140215	5.76013	2.5261	13318	0.547113	-0.87009	21330	0.876251	-0.190583	38379	1.57664	0.65685
A_23_P59045	HIST1H2AE	Homo sapiens histone cluster 1, H2ae (HIST1H2AE), mRNA [NM_021052]	41213	2.88937	1.53075	37920	2.6585	1.41061	29743	2.08523	1.06021	86666	6.076	2.60312	45608	3.19749	1.67694	148355	10.4009	3.37864	10033	0.703396	-0.507592	15511	1.08745	0.120947	17247	1.20916	0.274001
A_23_P81859	HIST1H2AH	Homo sapiens histone cluster 1, H2ah (HIST1H2AH), mRNA [NM_080596]	76334	1.9311	0.949426	61627	1.55905	0.640663	47872	1.21107	0.276283	128119	3.24117	1.69651	86074	2.17751	1.12268	237112	5.99848	2.5846	26808	0.678191	-0.560236	44962	1.13745	0.185807	46816	1.18436	0.244102
A_33_P3360216	HIST1H2AI	Homo sapiens histone cluster 1, H2ai (HIST1H2AI), mRNA [NM_003509]	1260	2.41688	1.27315	866	1.66113	0.732161	844	1.61893	0.695037	2959	5.67583	2.50483	1270	2.43606	1.28455	9780	18.7596	4.22956	342	0.65601	-0.60821	764	1.46547	0.551367	458	0.878517	-0.186859
A_33_P3344086	HIST1H2AJ	Homo sapiens histone cluster 1, H2aj (HIST1H2AJ), mRNA [NM_021066]	98432	1.77543	0.828165	64196	1.15791	0.211521	53327	0.961864	-0.0560958	122514	2.2098	1.14391	88700	1.59989	0.677972	175073	3.15781	1.65892	39779	0.717497	-0.478955	49417	0.891339	-0.165955	77128	1.39116	0.476293
A_24_P217848	HIST1H2AK	Homo sapiens histone cluster 1, H2ak (HIST1H2AK), mRNA [NM_003510]	66944	1.55401	0.635992	52303	1.21414	0.279931	40785	0.946764	-0.0789238	123149	2.85872	1.51537	81163	1.88408	0.91386	211936	4.91978	2.29859	28302	0.656989	-0.606058	50588	1.17433	0.231833	50345	1.16868	0.224886
A_32_P221799	HIST1H2AM	Homo sapiens histone cluster 1, H2am (HIST1H2AM), mRNA [NM_003514]	2978	2.10907	1.0766	4518	3.19972	1.67794	2899	2.05312	1.03782	7239	5.12677	2.35805	1429	1.01204	0.0172658	14875	10.5347	3.39708	1107	0.783994	-0.351085	1642	1.16289	0.217714	1487	1.05312	0.0746646
A_23_P111054	HIST1H2BB	Homo sapiens histone cluster 1, H2bb (HIST1H2BB), mRNA [NM_021062]	8355	1.3714	0.455645	20197	3.31515	1.72907	10396	1.70641	0.770962	38139	6.26016	2.6462	10289	1.68884	0.756036	37539	6.16168	2.62332	4610	0.756689	-0.402228	6958	1.14209	0.191678	6709	1.10122	0.139103
A_23_P93180	HIST1H2BC	Homo sapiens histone cluster 1, H2bc (HIST1H2BC), mRNA [NM_003526]	27495	1.06957	0.0970267	43364	1.68688	0.754355	23229	0.903618	-0.146216	71695	2.78897	1.47973	35986	1.39987	0.485293	79872	3.10705	1.63555	13490	0.524767	-0.930252	40130	1.56107	0.642539	23500	0.91416	-0.129482
A_24_P146211	HIST1H2BD	Homo sapiens histone cluster 1, H2bd (HIST1H2BD), transcript variant 1, mRNA [NM_021063]	62737	1.16294	0.217774	70728	1.31106	0.390739	46472	0.861438	-0.215181	140164	2.59818	1.3775	77753	1.44128	0.527356	145309	2.69355	1.42951	47905	0.888001	-0.171366	56872	1.05422	0.0761758	57064	1.05778	0.0810381
A_33_P3229122	HIST1H2BF	Homo sapiens histone cluster 1, H2bf (HIST1H2BF), mRNA [NM_003522]	758	2.92664	1.54925	1931	7.4556	2.89832	900	3.4749	1.79697	929	3.58687	1.84273	474	1.83012	0.871935	1821	7.03089	2.81371	260	1.00386	0.00555953	253	0.976834	-0.0338147	264	1.01931	0.0275858
A_23_P167997	HIST1H2BG	Homo sapiens histone cluster 1, H2bg (HIST1H2BG), mRNA [NM_003518]	40865	2.59493	1.3757	26847	1.70479	0.769592	21751	1.38119	0.465913	60419	3.83661	1.93983	17014	1.08039	0.111554	76424	4.85293	2.27886	13843	0.879032	-0.186012	22695	1.44114	0.527206	10706	0.679832	-0.556749
A_23_P111041	HIST1H2BI	Homo sapiens histone cluster 1, H2bi (HIST1H2BI), mRNA [NM_003525]	23515	1.17748	0.235699	33360	1.67045	0.740237	22631	1.13321	0.180418	68000	3.40499	1.76765	39565	1.98116	0.986342	75021	3.75656	1.90941	13287	0.665326	-0.587867	17143	0.858409	-0.220263	29482	1.47627	0.561952
A_24_P55148	HIST1H2BJ	Homo sapiens histone cluster 1, H2bj (HIST1H2BJ), mRNA [NM_021058]	86534	1.29499	0.372937	89080	1.33309	0.414771	61531	0.920815	-0.119017	155004	2.31964	1.2139	109516	1.63891	0.712739	191293	2.86271	1.51738	45571	0.681973	-0.552214	56686	0.848309	-0.237338	98210	1.46972	0.55554
A_23_P145238	HIST1H2BK	Homo sapiens histone cluster 1, H2bk (HIST1H2BK), mRNA [NM_080593]	3832	4.01117	2.00402	8466	8.86183	3.1476	5097	5.33531	2.41557	23808	24.9211	4.6393	6237	6.52861	2.70678	31279	32.7415	5.03305	902	0.944173	-0.0828768	1004	1.05094	0.0716832	960	1.00488	0.0070302
A_24_P3783	HIST1H2BM	Homo sapiens histone cluster 1, H2bm (HIST1H2BM), mRNA [NM_003521]	42379	1.20377	0.267556	51399	1.45998	0.545946	29131	0.82746	-0.273239	113834	3.23343	1.69307	71063	2.01853	1.0133	117646	3.34171	1.74059	20229	0.5746	-0.799369	36324	1.03178	0.0451291	49063	1.39362	0.478841
A_23_P111037	HIST1H3A	Homo sapiens histone cluster 1, H3a (HIST1H3A), mRNA [NM_003529]	6330	0.939494	-0.0900436	10250	1.5213	0.605303	8898	1.32064	0.401232	38654	5.737	2.5203	9287	1.37837	0.462964	24809	3.68214	1.88054	5328	0.790778	-0.338655	9537	1.41548	0.501286	5348	0.793747	-0.33325
A_23_P93258	HIST1H3B	Homo sapiens histone cluster 1, H3b (HIST1H3B), mRNA [NM_003537]	11034	3.24784	1.69948	23997	7.06348	2.82038	18362	5.40483	2.43425	67348	19.8238	4.30916	6536	1.92386	0.944005	65554	19.2957	4.27021	2768	0.814757	-0.295559	4606	1.35577	0.439112	2818	0.829474	-0.269731
A_23_P70445	HIST1H3E	Homo sapiens histone cluster 1, H3e (HIST1H3E), mRNA [NM_003532]	5476	0.989639	-0.0150264	12736	2.30169	1.20269	9198	1.66229	0.733171	51471	9.30199	3.21754	8560	1.54699	0.629462	41776	7.54988	2.91645	4766	0.861325	-0.21537	8673	1.56741	0.648382	3161	0.571265	-0.807768
A_23_P42198	HIST1H3G	Homo sapiens histone cluster 1, H3g (HIST1H3G), mRNA [NM_003534]	8865	1.07268	0.101222	14600	1.76663	0.820998	12231	1.47997	0.565572	47683	5.76973	2.5285	17447	2.11112	1.07801	41188	4.98383	2.31725	6049	0.73194	-0.450202	10606	1.28335	0.35991	8138	0.984713	-0.0222242
A_33_P3404989	HIST1H3H	Homo sapiens histone cluster 1, H3h (HIST1H3H), mRNA [NM_003536]	8583	9.50498	3.24868	19835	21.9657	4.45718	15726	17.4153	4.12228	56422	62.4828	5.96539	3983	4.41085	2.14106	48839	54.0853	5.75716	756	0.837209	-0.25634	982	1.08749	0.120997	971	1.0753	0.104745
A_23_P309381	HIST2H2AA4	Homo sapiens histone cluster 2, H2aa4 (HIST2H2AA4), mRNA [NM_001040874]	5829	1.46888	0.554715	5418	1.36531	0.449227	3833	0.965897	-0.0500592	8381	2.11197	1.07859	9780	2.46451	1.3013	27789	7.00269	2.80791	1200	0.302394	-1.7255	5335	1.34439	0.426955	5370	1.35321	0.436389
A_23_P149545	HIST2H2BE	Homo sapiens histone cluster 2, H2be (HIST2H2BE), mRNA [NM_003528]	3228	3.62425	1.85768	8682	9.74775	3.28507	5518	6.19536	2.63119	17266	19.3855	4.2769	5512	6.18862	2.62962	22860	25.6662	4.6818	557	0.625374	-0.677208	698	0.783683	-0.351659	1417	1.59094	0.669882
A_33_P3253501	HIST2H2BF	Homo sapiens histone cluster 2, H2bf (HIST2H2BF), transcript variant 2, mRNA [NM_001161334]	50812	0.943088	-0.084536	57019	1.05829	0.0817375	34704	0.644118	-0.634603	128579	2.38647	1.25488	97387	1.80754	0.854024	139061	2.58102	1.36794	41577	0.771683	-0.37392	57029	1.05848	0.0819905	63029	1.16984	0.226311
A_24_P169148	HMGB1	Homo sapiens high-mobility group box 1 (HMGB1), mRNA [NM_002128]	13907	0.825309	-0.276994	22570	1.33941	0.421601	16155	0.958716	-0.0608249	69944	4.15082	2.05339	25339	1.50374	0.588554	59476	3.52959	1.8195	21560	1.27947	0.355552	19370	1.14951	0.201018	9622	0.571016	-0.808397
A_33_P3287646	HSPB1	Homo sapiens heat shock 27kDa protein 1 (HSPB1), mRNA [NM_001540]	403	1.04314	0.0609337	2044	5.29077	2.40348	823	2.13028	1.09105	4293	11.1122	3.47407	621	1.60742	0.684747	2173	5.62468	2.49177	182	0.471096	-1.08591	448	1.15962	0.213653	529	1.36928	0.453422
A_23_P210330	HSPC159	Homo sapiens galectin-related protein (HSPC159), mRNA [NM_014181]	1170	1.874	0.90612	2381	3.81367	1.93118	1092	1.74907	0.806584	3825	6.12653	2.61507	1724	2.76135	1.46537	20492	32.8222	5.0366	361	0.578217	-0.790318	725	1.16124	0.215665	787	1.26054	0.334047
A_33_P3242973	IGF2BP2	Homo sapiens insulin-like growth factor 2 mRNA binding protein 2 (IGF2BP2), transcript variant 1, mRNA [NM_006548]	760	0.843195	-0.246061	1550	1.71967	0.782136	694	0.76997	-0.377125	4739	5.25777	2.39445	1579	1.75185	0.808879	9109	10.1061	3.33716	1702	1.88831	0.917098	382	0.423817	-1.23849	620	0.68787	-0.539793
A_33_P3233834	IL6ST	Homo sapiens interleukin 6 signal transducer (gp130, oncostatin M receptor) (IL6ST), transcript variant 2, mRNA [NM_175767]	1781	3.01184	1.59064	2458	4.15671	2.05544	1191	2.01409	1.01013	5926	10.0214	3.32502	2870	4.85344	2.27901	8581	14.5113	3.8591	505	0.854002	-0.227688	359	0.607103	-0.719988	910	1.5389	0.621895
A_33_P3374190	INPP5A	Homo sapiens inositol polyphosphate-5-phosphatase, 40kDa (INPP5A), mRNA [NM_005539]	575	0.594828	-0.749457	2203	2.27897	1.18838	1455	1.50517	0.589929	3839	3.97138	1.98964	1918	1.98414	0.988512	2914	3.01448	1.59191	709	0.733448	-0.447233	1373	1.42034	0.506241	818	0.846207	-0.240918
A_23_P30264	IPO11	Homo sapiens importin 11 (IPO11), transcript variant 2, mRNA [NM_016338]	659	1.26569	0.339918	896	1.72087	0.783139	474	0.910371	-0.135473	4569	8.77529	3.13345	1436	2.758	1.46362	3724	7.15237	2.83842	741	1.42318	0.509113	490	0.941101	-0.0875783	331	0.635723	-0.653529
A_24_P65373	ITGA2B	Homo sapiens integrin, alpha 2b (platelet glycoprotein IIb of IIb/IIIa complex, antigen CD41) (ITGA2B), mRNA [NM_000419]	5435	2.40416	1.26553	17278	7.64288	2.93412	13530	5.98496	2.58134	50936	22.5314	4.49387	26100	11.5453	3.52923	128993	57.0597	5.8344	3320	1.46859	0.554435	1719	0.760395	-0.395179	1743	0.771012	-0.375176
A_24_P318656	ITGB3	Homo sapiens integrin, beta 3 (platelet glycoprotein IIIa, antigen CD61) (ITGB3), mRNA [NM_000212]	7416	3.27996	1.71368	20369	9.00885	3.17134	10725	4.74348	2.24594	57203	25.2999	4.66106	20994	9.28527	3.21494	123412	54.5829	5.77038	2701	1.1946	0.256533	2056	0.909332	-0.137121	2026	0.896064	-0.158327
A_23_P166633	ITGB5	Homo sapiens integrin, beta 5 (ITGB5), mRNA [NM_002213]	633	0.701515	-0.511455	1411	1.56372	0.644986	1163	1.28888	0.366119	2304	2.55338	1.35241	1226	1.3587	0.442227	7730	8.56668	3.09874	1341	1.48615	0.571577	1049	1.16254	0.217282	317	0.351311	-1.50918
A_23_P171074	ITM2A	Homo sapiens integral membrane protein 2A (ITM2A), transcript variant 1, mRNA [NM_004867]	649	2.18274	1.12614	1430	4.80942	2.26586	1756	5.90583	2.56214	5858	19.7018	4.30026	669	2.25	1.16993	5266	17.7108	4.14655	322	1.08296	0.114979	338	1.13677	0.184942	232	0.780269	-0.357956
A_23_P374351	KCTD20	Homo sapiens potassium channel tetramerisation domain containing 20 (KCTD20), mRNA [NM_173562]	979	0.816514	-0.292451	1473	1.22852	0.296926	897	0.748123	-0.418652	6596	5.50125	2.45976	3463	2.88824	1.53019	10293	8.58465	3.10176	1006	0.839033	-0.253201	1313	1.09508	0.131035	1278	1.06589	0.0920562
A_33_P3306153	KIAA1841	Homo sapiens KIAA1841 (KIAA1841), transcript variant 2, mRNA [NM_032506]	4179	3.38381	1.75865	7756	6.28016	2.6508	5977	4.83968	2.27491	11795	9.55061	3.25559	4176	3.38138	1.75761	3883	3.14413	1.65266	1066	0.863158	-0.212304	1117	0.904453	-0.144882	1522	1.23239	0.301457
A_33_P3215239	KIF20B	Homo sapiens kinesin family member 20B (KIF20B), mRNA [NM_016195]	884	1.1652	0.22058	1235	1.62786	0.702973	1593	2.09974	1.07021	3241	4.27197	2.0949	1509	1.98902	0.992055	1099	1.44859	0.534653	870	1.14675	0.197549	893	1.17707	0.235194	513	0.676186	-0.564507
A_33_P3407065	KIF2A	Homo sapiens kinesin heavy chain member 2A (KIF2A), transcript variant 2, mRNA [NM_001098511]	3075	1.75815	0.814056	8778	5.01887	2.32736	5871	3.35678	1.74708	17473	9.99028	3.32053	5060	2.89308	1.53261	26933	15.3991	3.94477	1299	0.74271	-0.429129	2461	1.40709	0.492714	1487	0.8502	-0.234126
A_23_P169437	LCN2	Homo sapiens lipocalin 2 (LCN2), mRNA [NM_005564]	2280	3.52033	1.81571	18641	28.7818	4.84708	3897	6.01698	2.58904	60577	93.5311	6.54737	4752	7.33711	2.87521	28001	43.2337	5.43408	601	0.927946	-0.107887	962	1.48533	0.570785	380	0.586722	-0.769252
A_32_P216548	LDLRAP1	Homo sapiens low density lipoprotein receptor adaptor protein 1 (LDLRAP1), mRNA [NM_015627]	2753	1.72314	0.785038	4380	2.7415	1.45496	4325	2.70707	1.43673	8266	5.1738	2.37122	3297	2.06363	1.04519	28483	17.8279	4.15606	1561	0.97705	-0.0334959	2108	1.31942	0.399908	1124	0.703526	-0.507324
A_33_P3303449	LEPR	Homo sapiens leptin receptor (LEPR), transcript variant 2, mRNA [NM_001003680]	387	1.09322	0.128584	1525	4.30791	2.10699	1255	3.5452	1.82587	2224	6.28249	2.65134	638	1.80226	0.849807	2835	8.00847	3.00153	303	0.855932	-0.224432	490	1.38418	0.469032	269	0.759887	-0.396143
A_23_P210358	LIMS1	Homo sapiens LIM and senescent cell antigen-like domains 1 (LIMS1), mRNA [NM_004987]	3919	1.49771	0.582755	9913	3.78841	1.92159	7262	2.77529	1.47264	32681	12.4896	3.64265	5407	2.06637	1.0471	39400	15.0573	3.91239	803	0.306879	-1.70426	5898	2.25401	1.1725	1149	0.439108	-1.18735
A_33_P3311285	LMNA	Homo sapiens lamin A/C (LMNA), transcript variant 1, mRNA [NM_170707]	6939	1.53938	0.622347	8358	1.85417	0.890777	5458	1.21083	0.275992	20020	4.44132	2.15099	6136	1.36124	0.444918	60449	13.4103	3.74527	7898	1.75213	0.809107	1893	0.419951	-1.25171	3732	0.827923	-0.272432
A_32_P196142	LOC100130938	PREDICTED: Homo sapiens hypothetical LOC100130938 (LOC100130938), mRNA [XM_001722558]	4610	4.22936	2.08044	7798	7.15413	2.83878	3405	3.12385	1.64333	20209	18.5404	4.2126	1941	1.78073	0.832472	23792	21.8275	4.44808	1425	1.30734	0.386634	1437	1.31835	0.398732	408	0.374312	-1.41769
A_33_P3312187	LOC100131209	PREDICTED: Homo sapiens hypothetical LOC100131209 (LOC100131209), mRNA [XM_001723485]	5551	1.46994	0.555762	14526	3.84659	1.94358	11703	3.09904	1.63182	13207	3.49731	1.80624	8444	2.23603	1.16094	37764	10.0002	3.32195	3982	1.05446	0.0765071	6234	1.65081	0.723172	1113	0.29473	-1.76253
A_32_P52330	LOC113230	Homo sapiens hypothetical protein LOC113230 (LOC113230), non-coding RNA [NR_024282]	6656	3.37868	1.75646	14645	7.43401	2.89414	10300	5.22843	2.38638	50149	25.4563	4.66995	4638	2.35431	1.23531	32082	16.2853	4.0255	2040	1.03553	0.0503735	2796	1.41929	0.505169	1074	0.545178	-0.875202
A_33_P3399718	LOC128322	PREDICTED: Homo sapiens similar to nuclear transport factor 2 (LOC128322), mRNA [XM_001716411]	1051	1.1541	0.206768	4382	4.81186	2.26659	2123	2.33126	1.22111	9409	10.332	3.36905	2043	2.24341	1.16569	6553	7.19583	2.84716	886	0.972914	-0.0396164	904	0.992679	-0.0106003	942	1.03441	0.048804
A_24_P58037	LOC392288	PREDICTED: Homo sapiens similar to microtubule-associated proteins 1A [XM_373277]	762	1.36315	0.446943	2953	5.28265	2.40126	1720	3.07692	1.62149	4419	7.90519	2.9828	1852	3.31306	1.72816	2872	5.13775	2.36114	187	0.334526	-1.57981	824	1.47406	0.559796	666	1.19141	0.252674
A_33_P3269678	LOC541471	Homo sapiens hypothetical LOC541471 (LOC541471), transcript variant 1, non-coding RNA [NR_015395]	1652	1.1882	0.248783	4607	3.31359	1.7284	4053	2.91513	1.54356	9350	6.72501	2.74954	7368	5.29945	2.40584	14126	10.1602	3.34485	846	0.608487	-0.716701	1955	1.40614	0.491738	1370	0.985375	-0.0212549
A_33_P3317553	LOC642397	Homo sapiens cDNA clone IMAGE:4804281. [BC117556]	623	1.22638	0.294404	1566	3.08268	1.62418	1107	2.17913	1.12375	3089	6.08071	2.60424	801	1.57677	0.656974	3240	6.37795	2.67309	301	0.59252	-0.755065	747	1.47047	0.55628	476	0.937008	-0.0938669
A_33_P3247057	LOC643008	Homo sapiens hypothetical protein LOC643008 (LOC643008), transcript variant 1, mRNA [NM_001162995]	3069	3.33708	1.73859	11013	11.975	3.58195	7194	7.8224	2.96761	57471	62.4911	5.96558	10092	10.9735	3.45596	53426	58.0928	5.86029	1118	1.21566	0.281737	1130	1.22871	0.29714	511	0.555636	-0.847788
A_33_P3332175	LOC644310	PREDICTED: Homo sapiens similar to ubiquinol-cytochrome c reductase complex (LOC644310), mRNA [XM_001714131]	3888	0.95263	-0.0700123	2838	0.695361	-0.524166	4130	1.01192	0.0171012	10794	2.64472	1.40312	5876	1.43973	0.525794	7116	1.74355	0.802026	3592	0.880105	-0.184253	4949	1.21259	0.278096	3703	0.907302	-0.140346
A_24_P169574	LOC649395	Homo sapiens tyrosine 3-monooxygenase/tryptophan 5-monooxygenase activation protein, epsilon polypeptide pseudogene (LOC649395), non-coding RNA [NR_029404]	2524	1.55514	0.637049	5015	3.08996	1.62759	3586	2.20949	1.14371	10597	6.52927	2.70692	2900	1.78681	0.83739	6092	3.75354	1.90825	2376	1.46396	0.549872	1056	0.650647	-0.620053	1437	0.885397	-0.175603
A_33_P3348744	LOC652191	PREDICTED: Homo sapiens similar to microtubule-associated protein 1 light chain 3 beta (LOC652191), mRNA [XM_001714614]	1826	0.515819	-0.955063	6560	1.85311	0.889946	4128	1.1661	0.221694	20178	5.7	2.51096	7243	2.04605	1.03284	11223	3.17034	1.66464	2089	0.590113	-0.760937	6699	1.89237	0.920196	1832	0.517514	-0.95033
A_33_P3311308	LOC727918	PREDICTED: Homo sapiens hypothetical LOC727918 (LOC727918), mRNA [XM_001133617]	723	2.48454	1.31298	2847	9.78351	3.29035	1442	4.95533	2.30898	4943	16.9863	4.0863	744	2.5567	1.35428	2694	9.25773	3.21066	310	1.06529	0.0912491	308	1.05842	0.0819112	255	0.876289	-0.190522
A_33_P3337019	LOC728975	full-length cDNA clone CS0DN001YA08 of Adult brain of Homo sapiens (human). [CR609936]	5633	4.77913	2.25675	9332	7.91742	2.98503	5151	4.37019	2.1277	31989	27.14	4.76235	2236	1.89706	0.923764	59161	50.1932	5.64942	623	0.528563	-0.919852	2351	1.99463	0.996119	562	0.47681	-1.06851
A_33_P3336422	LOC729013	Homo sapiens cDNA clone IMAGE:5296353. [BC036635]	1687	1.13399	0.181409	4014	2.69819	1.43199	4232	2.84472	1.50829	13019	8.75129	3.1295	2820	1.89559	0.922644	7761	5.21689	2.38319	1865	1.25364	0.326124	1504	1.01098	0.0157533	1094	0.73538	-0.443439
A_33_P3279515	LOC729451	Homo sapiens cDNA FLJ39579 fis, clone SKMUS2003168. [AK096898]	1634	3.18105	1.6695	2772	5.3965	2.43202	2996	5.83258	2.54413	7081	13.7852	3.78505	775	1.50876	0.593364	5046	9.82349	3.29624	631	1.22842	0.296808	590	1.1486	0.199882	320	0.622972	-0.682761
A_24_P391960	LOC730144	PREDICTED: Homo sapiens similar to eukaryotic translation initiation factor 1 (LOC730144), mRNA [XM_001131332]	5560	0.811245	-0.301791	9840	1.43573	0.521782	4685	0.683576	-0.548827	35725	5.21254	2.38199	10848	1.5828	0.662481	12197	1.77963	0.831578	7365	1.07461	0.103809	7103	1.03638	0.0515525	6093	0.889013	-0.169723
A_33_P3304655	LTBP1	Homo sapiens latent transforming growth factor beta binding protein 1 (LTBP1), transcript variant 1, mRNA [NM_206943]	762	2.86108	1.51656	1253	4.70463	2.23408	822	3.08636	1.62591	1586	5.95494	2.57409	1341	5.03504	2.332	9240	34.6934	5.11659	351	1.3179	0.398238	235	0.882353	-0.180572	213	0.79975	-0.32238
A_33_P3230090	LUZP6	Homo sapiens leucine zipper protein 6 (LUZP6), mRNA [NM_001128619]	2579	0.974802	-0.0368195	7982	3.01701	1.59312	5990	2.26408	1.17892	14102	5.33023	2.4142	6743	2.5487	1.34976	27110	10.2469	3.35712	1153	0.435807	-1.19824	3594	1.35845	0.441959	3190	1.20575	0.269925
A_23_P77630	MAP1LC3B	Homo sapiens microtubule-associated protein 1 light chain 3 beta (MAP1LC3B), mRNA [NM_022818]	980	1.05263	0.0740006	2800	3.00752	1.58857	2366	2.54135	1.3456	7163	7.69388	2.94371	4201	4.51235	2.17388	4743	5.09452	2.34895	534	0.573577	-0.801941	921	0.989259	-0.01558	1338	1.43716	0.523225
A_23_P418015	MAPRE2	Homo sapiens microtubule-associated protein, RP/EB family, member 2 (MAPRE2), transcript variant 1, mRNA [NM_014268]	2117	1.81977	0.863757	4761	4.09255	2.033	3179	2.73266	1.45031	6629	5.69828	2.51053	1841	1.58252	0.662225	11428	9.8235	3.29624	602	0.517479	-0.950429	1538	1.32206	0.402791	1350	1.16046	0.214695
A_23_P33683	MARCH2	Homo sapiens membrane-associated ring finger (C3HC4) 2 (MARCH2), transcript variant 1, mRNA [NM_016496]	1758	1.90191	0.92745	2052	2.21998	1.15055	1155	1.24955	0.321408	7560	8.17887	3.0319	3495	3.7811	1.91881	11205	12.1223	3.59959	1155	1.24955	0.321408	420	0.454382	-1.13802	1198	1.29607	0.374143
A_23_P205549	MAX	Homo sapiens MYC associated factor X (MAX), transcript variant 3, mRNA [NM_145113]	4134	1.22199	0.289235	6185	1.82826	0.87047	4584	1.35501	0.438304	10577	3.12651	1.64456	7277	2.15105	1.10504	62176	18.379	4.19998	2596	0.767366	-0.382013	4216	1.24623	0.317572	3337	0.986403	-0.0197515
A_24_P319736	MEIS1	Homo sapiens Meis homeobox 1 (MEIS1), mRNA [NM_002398]	2494	4.62995	2.211	3637	6.75186	2.75528	5019	9.31745	3.21994	6528	12.1188	3.59918	1101	2.04394	1.03135	9052	16.8045	4.07077	804	1.49257	0.577803	291	0.540223	-0.888374	521	0.967203	-0.0481094
A_24_P76675	MFAP3L	Homo sapiens microfibrillar-associated protein 3-like (MFAP3L), transcript variant 1, mRNA [NM_021647]	720	1.88811	0.916944	1850	4.8514	2.2784	1397	3.66346	1.87321	3499	9.1757	3.19782	897	2.35227	1.23406	6172	16.1853	4.01661	276	0.723776	-0.466384	601	1.57605	0.656312	267	0.700175	-0.514213
A_24_P226008	MGLL	Homo sapiens monoglyceride lipase (MGLL), transcript variant 1, mRNA [NM_007283]	702	1.15334	0.205819	1095	1.79901	0.847207	1461	2.40033	1.26323	4573	7.51314	2.90942	1494	2.45455	1.29546	11820	19.4195	4.27943	936	1.53779	0.620856	344	0.56517	-0.823244	546	0.897043	-0.156751
A_24_P230916	MIER1	Homo sapiens mesoderm induction early response 1 homolog (Xenopus laevis) (MIER1), transcript variant 4, mRNA [NM_001077702]	2240	1.16343	0.21839	4587	2.38244	1.25244	4085	2.12171	1.08523	7479	3.88452	1.95774	6102	3.16932	1.66417	3564	1.85111	0.888389	953	0.494979	-1.01456	1998	1.03774	0.0534483	2825	1.46728	0.553143
A_33_P3338733	MITF	Homo sapiens microphthalmia-associated transcription factor (MITF), transcript variant 1, mRNA [NM_198159]	802	1.08918	0.123243	863	1.17202	0.229002	1028	1.39611	0.481409	4117	5.59122	2.48316	1014	1.37709	0.461627	3756	5.10095	2.35077	641	0.87053	-0.200035	770	1.04572	0.0644994	798	1.08375	0.11603
A_23_P164047	MMD	Homo sapiens monocyte to macrophage differentiation-associated (MMD), mRNA [NM_012329]	19465	3.11324	1.63842	26692	4.26913	2.09394	24431	3.9075	1.96625	98716	15.7887	3.98082	19183	3.06813	1.61736	123871	19.812	4.3083	7548	1.20723	0.2717	6947	1.11111	0.151995	4262	0.681666	-0.552864
A_33_P3317073	MOBKL1A	Homo sapiens MOB1, Mps One Binder kinase activator-like 1A (yeast) (MOBKL1A), mRNA [NM_173468]	1339	1.24674	0.318162	4150	3.86406	1.95012	2403	2.23743	1.16184	7955	7.40689	2.88887	1451	1.35102	0.434054	4038	3.75978	1.91065	1311	1.22067	0.287674	1289	1.20019	0.263258	622	0.579143	-0.788008
A_33_P3247858	MPP1	Homo sapiens membrane protein, palmitoylated 1, 55kDa (MPP1), transcript variant 3, mRNA [NM_001166461]	4890	2.71415	1.4405	9197	5.10472	2.35183	5201	2.88677	1.52946	14346	7.96263	2.99324	9192	5.10194	2.35105	27533	15.282	3.93376	914	0.507308	-0.979066	2242	1.2444	0.315454	2249	1.24829	0.319952
A_33_P3236868	MT1X	Homo sapiens metallothionein 1X (MT1X), mRNA [NM_005952]	1425	2.29962	1.2014	6901	11.1366	3.47724	1758	2.83701	1.50437	9394	15.1598	3.92218	2918	4.70898	2.23542	6055	9.77138	3.28856	436	0.703604	-0.507164	504	0.813341	-0.298069	919	1.48306	0.568572
A_24_P55465	MTPN	Homo sapiens myotrophin (MTPN), mRNA [NM_145808]	900	0.685976	-0.543771	1652	1.25915	0.332446	1491	1.13643	0.184513	7359	5.60899	2.48774	3458	2.63567	1.39817	9654	7.35823	2.87936	915	0.697409	-0.519924	1572	1.19817	0.260833	1449	1.10442	0.14329
A_33_P3383029	MXI1	Homo sapiens MAX interactor 1 (MXI1), transcript variant 2, mRNA [NM_130439]	4258	0.928478	-0.10706	3601	0.785216	-0.348839	2427	0.529219	-0.918062	10101	2.20257	1.13919	4106	0.895334	-0.159503	2682	0.584823	-0.773927	6325	1.3792	0.463829	3980	0.867859	-0.204468	3453	0.752944	-0.409386
A_33_P3353692	MYH9	Homo sapiens myosin, heavy chain 9, non-muscle (MYH9), mRNA [NM_002473]	11825	0.951072	-0.0723729	16936	1.36214	0.44588	11858	0.953727	-0.0683524	33272	2.67603	1.4201	57598	4.63255	2.21181	84968	6.83389	2.77271	8013	0.644477	-0.633799	13769	1.10743	0.147211	15518	1.2481	0.31973
A_23_P4572	MYL12A	Homo sapiens myosin, light chain 12A, regulatory, non-sarcomeric (MYL12A), mRNA [NM_006471]	17463	0.611264	-0.710132	28182	0.986465	-0.0196597	24685	0.864059	-0.210799	81040	2.83667	1.5042	67670	2.36868	1.24408	106923	3.74267	1.90407	22146	0.775185	-0.367388	43460	1.52125	0.605254	20100	0.703568	-0.507238
A_24_P75230	MYL12B	Homo sapiens myosin, light chain 12B, regulatory (MYL12B), transcript variant 2, mRNA [NM_033546]	17894	0.661793	-0.595548	26524	0.980966	-0.0277257	20510	0.758543	-0.398697	89945	3.32653	1.73402	59120	2.1865	1.12862	93653	3.46367	1.7923	27668	1.02328	0.0331944	38023	1.40625	0.491848	15425	0.570479	-0.809754
A_23_P258018	MYL5	Homo sapiens myosin, light chain 5, regulatory (MYL5), mRNA [NM_002477]	503	1.04501	0.0635221	4215	8.75693	3.13042	3017	6.26801	2.64801	7759	16.1198	4.01076	3116	6.47368	2.69459	11744	24.3989	4.60874	586	1.21745	0.283864	468	0.972299	-0.0405278	390	0.810249	-0.303562
A_24_P56130	MYL6	Homo sapiens myosin, light chain 6, alkali, smooth muscle and non-muscle (MYL6), transcript variant 2, mRNA [NM_079423]	13211	1.00243	0.00349877	13929	1.05691	0.0798508	13917	1.056	0.0786073	52977	4.0198	2.00713	42301	3.20973	1.68245	85266	6.46984	2.69373	8903	0.675544	-0.565877	15921	1.20806	0.27269	14713	1.1164	0.158851
A_23_P210425	MYL9	Homo sapiens myosin, light chain 9, regulatory (MYL9), transcript variant 2, mRNA [NM_181526]	10699	3.93346	1.9758	33604	12.3544	3.62695	30455	11.1967	3.485	82383	30.2879	4.92067	55802	20.5154	4.35864	130251	47.8864	5.58154	1738	0.638971	-0.646179	2660	0.977941	-0.0321804	3762	1.38309	0.467893
A_24_P319923	MYLK	Homo sapiens myosin light chain kinase (MYLK), transcript variant 1, mRNA [NM_053025]	2921	4.14718	2.05213	4240	6.01988	2.58973	3506	4.97776	2.3155	17241	24.4785	4.61344	3177	4.51065	2.17333	47689	67.708	6.08125	1178	1.6725	0.742009	584	0.829153	-0.27029	351	0.498344	-1.00479
A_23_P141770	NAPG	Homo sapiens N-ethylmaleimide-sensitive factor attachment protein, gamma (NAPG), mRNA [NM_003826]	853	1.27822	0.354138	2332	3.49451	1.80509	700	1.04895	0.0689474	4749	7.11638	2.83114	1727	2.58791	1.37179	2495	3.73876	1.90256	634	0.95005	-0.0739247	650	0.974026	-0.0379679	718	1.07592	0.105576
A_33_P3223958	NAT8B	Homo sapiens N-acetyltransferase 8B (GCN5-related, putative, gene/pseudogene) (NAT8B), mRNA [NM_016347]	2749	1.7705	0.824159	3493	2.24968	1.16972	2976	1.9167	0.938626	9170	5.90597	2.56217	1406	0.905539	-0.143152	12463	8.02684	3.00483	2204	1.41949	0.505376	1687	1.08652	0.119712	767	0.493989	-1.01745
A_33_P3268567	NCK2	Homo sapiens NCK adaptor protein 2 (NCK2), transcript variant 1, mRNA [NM_003581]	2164	1.59901	0.677183	4745	3.50616	1.80989	2593	1.91601	0.938105	12820	9.47291	3.24381	4890	3.6133	1.85332	41364	30.5645	4.93379	580	0.428571	-1.22239	2324	1.71724	0.780093	1156	0.854187	-0.227376
A_24_P273143	NCRNA00152	Homo sapiens non-protein coding RNA 152 (NCRNA00152), transcript variant 1, non-coding RNA [NR_024204]	45526	1.60746	0.684785	79359	2.80206	1.48649	45716	1.61417	0.690793	150991	5.33129	2.41448	66143	2.33542	1.22368	100775	3.55823	1.83116	38759	1.36853	0.452625	16950	0.598482	-0.740621	29256	1.03299	0.0468264
A_24_P23245	NDUFA6	Homo sapiens NADH dehydrogenase (ubiquinone) 1 alpha subcomplex, 6, 14kDa (NDUFA6), nuclear gene encoding mitochondrial protein, mRNA [NM_002490]	8257	1.20911	0.273943	21765	3.18714	1.67226	10041	1.47035	0.556157	54587	7.99341	2.99881	9406	1.37736	0.461907	37362	5.47108	2.45183	7971	1.16723	0.223086	7761	1.13648	0.184568	4755	0.696295	-0.522229
A_23_P256172	NDUFAF3	Homo sapiens NADH dehydrogenase (ubiquinone) 1 alpha subcomplex, assembly factor 3 (NDUFAF3), nuclear gene encoding mitochondrial protein, transcript variant 1, mRNA [NM_199069]	8890	0.96386	-0.0531048	14295	1.54987	0.63215	11499	1.24673	0.318148	43649	4.73245	2.24259	19725	2.1386	1.09667	61668	6.68609	2.74116	9146	0.991615	-0.0121473	9869	1.07	0.0976157	8655	0.938381	-0.0917544
A_23_P137948	NENF	Homo sapiens neuron derived neurotrophic factor (NENF), transcript variant 1, mRNA [NM_013349]	1197	1.29033	0.367745	1589	1.7129	0.776441	1378	1.48545	0.570897	5340	5.75638	2.52516	1620	1.74632	0.804315	10176	10.9695	3.45542	934	1.00683	0.00981605	682	0.735178	-0.443835	1167	1.25799	0.331126
A_33_P3341429	NEXN	Homo sapiens nexilin (F actin binding protein) (NEXN), transcript variant 1, mRNA [NM_144573]	1312	1.10655	0.146069	4068	3.43098	1.77862	2435	2.0537	1.03822	11874	10.0146	3.32404	2153	1.81586	0.86065	15434	13.0171	3.70234	1118	0.942929	-0.0847783	2076	1.75091	0.808108	363	0.306157	-1.70766
A_23_P45524	NGFRAP1	Homo sapiens nerve growth factor receptor (TNFRSF16) associated protein 1 (NGFRAP1), transcript variant 3, mRNA [NM_014380]	16656	4.23458	2.08222	28721	7.30195	2.86828	24966	6.34729	2.66614	93467	23.7628	4.57063	27562	7.00729	2.80886	120048	30.5207	4.93172	4236	1.07695	0.10695	4954	1.25949	0.332841	2610	0.663559	-0.591703
A_24_P95822	NPTN	Homo sapiens neuroplastin (NPTN), transcript variant b, mRNA [NM_012428]	4621	1.39425	0.479486	10798	3.25797	1.70397	7731	2.3326	1.22194	22536	6.79956	2.76544	8058	2.43126	1.2817	24535	7.4027	2.88805	2657	0.80167	-0.31892	2693	0.812531	-0.299504	4593	1.3858	0.470718
A_23_P116264	NRGN	Homo sapiens neurogranin (protein kinase C substrate, RC3) (NRGN), transcript variant 1, mRNA [NM_006176]	64517	2.5578	1.3549	73251	2.90406	1.53807	76090	3.01661	1.59293	178164	7.06337	2.82036	113433	4.49709	2.16899	394145	15.626	3.96588	13251	0.52534	-0.928677	41634	1.65059	0.722984	20786	0.824067	-0.279166
A_23_P59547	NT5C3	Homo sapiens 5-nucleotidase, cytosolic III (NT5C3), transcript variant 1, mRNA [NM_001002010]	4534	2.02803	1.02008	12443	5.56568	2.47656	8042	3.59714	1.84685	31757	14.2047	3.8283	7450	3.33234	1.73654	37930	16.9659	4.08456	2231	0.997913	-0.00301459	2489	1.11331	0.154861	1987	0.888773	-0.170113
A_33_P3242863	NT5M	Homo sapiens 5,3-nucleotidase, mitochondrial (NT5M), nuclear gene encoding mitochondrial protein, mRNA [NM_020201]	814	2.62299	1.39121	2454	7.90763	2.98324	3342	10.7691	3.42882	5334	17.188	4.10333	1695	5.46187	2.44939	11135	35.8808	5.16514	303	0.976369	-0.0345009	240	0.773362	-0.370784	388	1.25027	0.322238
A_23_P118038	NUTF2	Homo sapiens nuclear transport factor 2 (NUTF2), mRNA [NM_005796]	13188	1.46832	0.554171	29197	3.25073	1.70077	18744	2.08692	1.06137	66876	7.44583	2.89643	16249	1.80913	0.855296	66500	7.40397	2.8883	9815	1.09278	0.128005	8429	0.938467	-0.0916217	8701	0.968751	-0.045802
A_23_P171336	NXF3	Homo sapiens nuclear RNA export factor 3 (NXF3), mRNA [NM_022052]	440	1.03611	0.0511727	702	1.65306	0.72514	439	1.03375	0.0478901	2553	6.01177	2.58779	861	2.02747	1.01968	2608	6.14129	2.61854	476	1.12088	0.164631	572	1.34694	0.429684	226	0.532182	-0.910008
A_23_P321935	OSBP2	Homo sapiens oxysterol binding protein 2 (OSBP2), transcript variant 1, mRNA [NM_030758]	568	1.89123	0.919326	421	1.40178	0.487256	699	2.32741	1.21873	3582	11.9267	3.57613	1754	5.84018	2.54601	10475	34.8779	5.12424	412	1.37181	0.45608	252	0.839068	-0.253141	237	0.789123	-0.341678
A_32_P57854	OST4	Homo sapiens dolichyl-diphosphooligosaccharide--protein glycosyltransferase subunit 4 (OST4), mRNA [NM_001134693]	99594	1.37782	0.462382	133278	1.84381	0.88269	113982	1.57686	0.657058	291586	4.03389	2.01217	167554	2.318	1.21288	253438	3.50614	1.80988	79374	1.09809	0.13499	91136	1.2608	0.334345	46342	0.64111	-0.641356
A_23_P143902	P2RY12	Homo sapiens purinergic receptor P2Y, G-protein coupled, 12 (P2RY12), transcript variant 1, mRNA [NM_022788]	568	1.6989	0.764604	2268	6.78365	2.76206	1690	5.05484	2.33766	2850	8.52443	3.0916	652	1.95015	0.963585	7354	21.996	4.45917	520	1.55533	0.637224	282	0.84347	-0.245592	201	0.601196	-0.734092
A_33_P3303372	PARD3	Homo sapiens par-3 partitioning defective 3 homolog (C. elegans) (PARD3), mRNA [NM_019619]	800	1.13636	0.184425	1016	1.44318	0.529253	1053	1.49574	0.580858	2067	2.93608	1.55389	886	1.25852	0.331731	4010	5.69602	2.50995	939	1.33381	0.41555	864	1.22727	0.295456	309	0.43892	-1.18797
A_33_P3231981	PARK7	Homo sapiens Parkinson disease (autosomal recessive, early onset) 7 (PARK7), transcript variant 1, mRNA [NM_007262]	4973	0.967322	-0.0479326	9994	1.94398	0.959013	5834	1.1348	0.182436	32050	6.2342	2.6402	7649	1.48784	0.573222	28058	5.45769	2.44829	4498	0.874927	-0.192765	5953	1.15795	0.211568	4972	0.967127	-0.0482227
A_23_P40718	PARVB	Homo sapiens parvin, beta (PARVB), transcript variant 1, mRNA [NM_001003828]	3605	1.67156	0.741196	8038	3.72705	1.89803	2828	1.31128	0.390979	15374	7.12859	2.83362	4956	2.29799	1.20037	42733	19.8144	4.30848	1714	0.794745	-0.331436	1568	0.727048	-0.459878	3188	1.47821	0.563848
A_33_P3347413	PBXIP1	Homo sapiens pre-B-cell leukemia homeobox interacting protein 1 (PBXIP1), mRNA [NM_020524]	11096	1.51213	0.596581	29907	4.07563	2.02702	24540	3.34424	1.74168	80906	11.0256	3.46279	21281	2.90011	1.53611	34511	4.70305	2.2336	3743	0.510084	-0.971192	9301	1.26751	0.341999	8970	1.2224	0.289721
A_24_P283320	PCMT1	Homo sapiens protein-L-isoaspartate (D-aspartate) O-methyltransferase (PCMT1), mRNA [NM_005389]	3751	1.12812	0.173921	7837	2.35699	1.23695	4549	1.36812	0.452195	13347	4.01414	2.00509	9197	2.76602	1.46781	8355	2.51278	1.32929	2365	0.711278	-0.491514	2972	0.893835	-0.16192	4638	1.39489	0.480148
A_23_P151907	PCSK6	Homo sapiens proprotein convertase subtilisin/kexin type 6 (PCSK6), transcript variant 1, mRNA [NM_002570]	403	0.871665	-0.198154	1533	3.31579	1.72935	1459	3.15573	1.65797	3109	6.72459	2.74945	1678	3.62942	1.85974	10551	22.8212	4.5123	297	0.642394	-0.63847	746	1.61355	0.690242	344	0.744052	-0.426525
A_33_P3378514	PDE5A	Homo sapiens phosphodiesterase 5A, cGMP-specific (PDE5A), transcript variant 1, mRNA [NM_001083]	1759	2.00038	1.00027	2995	3.40599	1.76807	2438	2.77255	1.47122	5030	5.72024	2.51608	4040	4.59439	2.19987	17594	20.0083	4.32253	625	0.710766	-0.492554	1226	1.39424	0.479477	787	0.894996	-0.160047
A_23_P149992	PDLIM1	Homo sapiens PDZ and LIM domain 1 (PDLIM1), mRNA [NM_020992]	3041	3.26755	1.70821	7577	8.14148	3.02529	4605	4.94807	2.30686	12874	13.8331	3.79005	2061	2.21454	1.14701	13587	14.5992	3.86782	266	0.285817	-1.80684	2018	2.16834	1.11659	508	0.545845	-0.873436
A_33_P3393801	PDZK1IP1	Homo sapiens PDZK1 interacting protein 1 (PDZK1IP1), mRNA [NM_005764]	9412	2.88623	1.52919	15477	4.74609	2.24674	22854	7.00828	2.80906	37762	11.5799	3.53355	7809	2.39466	1.25982	35423	10.8626	3.4413	4374	1.34131	0.423639	1174	0.360012	-1.47388	4235	1.29868	0.377048
A_24_P79403	PF4	Homo sapiens platelet factor 4 (PF4), mRNA [NM_002619]	80069	2.96588	1.56846	74001	2.74112	1.45476	68622	2.54187	1.34589	185180	6.85937	2.77808	56458	2.0913	1.0644	224597	8.31943	3.05649	24100	0.892703	-0.163748	34486	1.27742	0.35323	22404	0.82988	-0.269025
A_33_P3332130	PGRMC1	Homo sapiens progesterone receptor membrane component 1 (PGRMC1), mRNA [NM_006667]	1426	1.41656	0.502388	3376	3.35364	1.74573	2425	2.40894	1.2684	18919	18.7937	4.23218	2746	2.72781	1.44775	21172	21.0318	4.3945	423	0.420199	-1.25086	2140	2.12583	1.08802	457	0.453974	-1.13932
A_24_P673786	PIP4K2A	Homo sapiens phosphatidylinositol-5-phosphate 4-kinase, type II, alpha (PIP4K2A), mRNA [NM_005028]	1277	0.803313	-0.315966	2422	1.52359	0.607475	1781	1.12036	0.163963	5923	3.72594	1.8976	3835	2.41246	1.2705	8605	5.41308	2.43645	1634	1.02789	0.0396837	1588	0.998952	-0.00151337	1547	0.97316	-0.0392511
A_23_P91221	PKIG	Homo sapiens protein kinase (cAMP-dependent, catalytic) inhibitor gamma (PKIG), transcript variant 1, mRNA [NM_181805]	1363	1.13018	0.176556	2086	1.72968	0.790509	1783	1.47844	0.564077	9069	7.5199	2.91071	1884	1.56219	0.643569	7608	6.30846	2.65729	1034	0.85738	-0.221994	1776	1.47264	0.558402	808	0.669983	-0.577803
A_23_P399501	PKM2	Homo sapiens pyruvate kinase, muscle (PKM2), transcript variant 2, mRNA [NM_182470]	17115	1.30235	0.381113	14199	1.08046	0.111641	12880	0.980089	-0.0290157	43727	3.32736	1.73438	34743	2.64373	1.40257	98700	7.51046	2.9089	13576	1.03305	0.0469102	14765	1.12353	0.168033	11084	0.843424	-0.24567
A_33_P3422812	PL-5283	Homo sapiens PL-5283 protein (PL-5283), mRNA [NM_001130929]	3186	1.38062	0.465311	3149	1.36458	0.448459	3447	1.49372	0.578906	33191	14.3829	3.84629	3652	1.58255	0.662252	26395	11.438	3.51576	916	0.396938	-1.33302	3910	1.69435	0.760734	2097	0.90871	-0.138108
A_23_P30020	PLA2G12A	Homo sapiens phospholipase A2, group XIIA (PLA2G12A), mRNA [NM_030821]	978	1.5023	0.587177	1651	2.5361	1.34261	1216	1.8679	0.901414	3796	5.83103	2.54375	1230	1.8894	0.917929	12401	19.0492	4.25166	955	1.46697	0.552843	529	0.812596	-0.29939	469	0.72043	-0.47307
A_23_P161424	PLXDC2	Homo sapiens plexin domain containing 2 (PLXDC2), mRNA [NM_032812]	1709	1.01224	0.0175526	1761	1.04304	0.0607951	1568	0.928727	-0.106674	4439	2.62922	1.39463	5131	3.03909	1.60364	7453	4.41441	2.14222	1427	0.845212	-0.242614	1598	0.946496	-0.0793324	2040	1.20829	0.272969
A_23_P99771	PNMA1	Homo sapiens paraneoplastic antigen MA1 (PNMA1), mRNA [NM_006029]	1492	2.03732	1.02668	3588	4.89941	2.29261	2020	2.75831	1.46378	7570	10.3368	3.36972	1765	2.4101	1.2691	15927	21.7483	4.44283	454	0.619936	-0.689808	1199	1.63723	0.711259	544	0.742831	-0.428894
A_23_P140256	PNP	Homo sapiens purine nucleoside phosphorylase (PNP), mRNA [NM_000270]	2578	1.09206	0.127058	3263	1.38224	0.467005	2892	1.22508	0.292873	9126	3.86586	1.95079	4052	1.71646	0.77944	9155	3.87814	1.95537	2090	0.885343	-0.175691	2049	0.867975	-0.204274	2943	1.24668	0.318093
A_23_P121596	PPBP	Homo sapiens pro-platelet basic protein (chemokine (C-X-C motif) ligand 7) (PPBP), mRNA [NM_002704]	75006	1.20391	0.267728	114410	1.83638	0.876863	80494	1.292	0.369603	171276	2.74913	1.45897	95496	1.53279	0.616162	246982	3.96427	1.98706	53715	0.862171	-0.213953	82032	1.31668	0.396908	51159	0.821145	-0.28429
A_23_P120364	PPDPF	Homo sapiens pancreatic progenitor cell differentiation and proliferation factor homolog (zebrafish) (PPDPF), mRNA [NM_024299]	12767	1.67524	0.744367	11259	1.47737	0.563026	18711	2.45519	1.29583	48517	6.36622	2.67044	14326	1.87981	0.910584	45829	6.01352	2.58821	10356	1.35888	0.442415	5486	0.719853	-0.474226	7021	0.92127	-0.118304
A_24_P407323	PPM1A	Homo sapiens protein phosphatase, Mg2+/Mn2+ dependent, 1A (PPM1A), transcript variant 2, mRNA [NM_177951]	3526	0.988413	-0.0168136	6044	1.69426	0.760658	3290	0.922258	-0.116758	13075	3.6652	1.87389	13293	3.72631	1.89775	18191	5.09933	2.35031	2849	0.798636	-0.32439	3519	0.986451	-0.0196805	4334	1.21491	0.280853
A_33_P3401647	PPP1R14A	Homo sapiens protein phosphatase 1, regulatory (inhibitor) subunit 14A (PPP1R14A), mRNA [NM_033256]	1282	2.46065	1.29904	1586	3.04415	1.60604	707	1.35701	0.440427	8606	16.5182	4.04599	1553	2.98081	1.5757	5150	9.88484	3.30522	359	0.68906	-0.5373	830	1.59309	0.671828	374	0.71785	-0.478245
A_33_P3214293	PPP3R1	Homo sapiens protein phosphatase 3 (formerly 2B), regulatory subunit B, alpha isoform (PPP3R1), mRNA [NM_000945]	2365	0.662651	-0.59368	6976	1.95461	0.96688	3518	0.98571	-0.0207644	10416	2.91846	1.54521	11033	3.09134	1.62823	16350	4.58112	2.1957	4176	1.17008	0.226602	2733	0.765761	-0.385034	3798	1.06416	0.08972
A_23_P983	PRDX6	Homo sapiens peroxiredoxin 6 (PRDX6), mRNA [NM_004905]	8422	1.37136	0.455611	9341	1.52101	0.605025	8453	1.37641	0.460912	23770	3.8705	1.95252	13441	2.18861	1.13002	32409	5.27719	2.39977	6626	1.07892	0.109586	5689	0.926346	-0.110377	6109	0.994735	-0.00761567
A_33_P3360675	PRKAR1B	Homo sapiens protein kinase, cAMP-dependent, regulatory, type I, beta (PRKAR1B), transcript variant 1, mRNA [NM_001164761]	2435	2.07765	1.05495	4366	3.72526	1.89734	4063	3.46672	1.79357	4177	3.56399	1.83349	1789	1.52645	0.610181	8418	7.18259	2.8445	2167	1.84898	0.886727	824	0.703072	-0.508256	525	0.447952	-1.15858
A_33_P3304983	PRKAR2B	Homo sapiens protein kinase, cAMP-dependent, regulatory, type II, beta (PRKAR2B), mRNA [NM_002736]	5606	3.23112	1.69204	12315	7.09798	2.82741	10694	6.16369	2.62379	25326	14.5971	3.86761	8336	4.80461	2.26442	71756	41.3579	5.37009	1578	0.90951	-0.136838	2147	1.23746	0.307387	1480	0.853026	-0.229338
A_33_P3380529	PRTFDC1	Homo sapiens phosphoribosyl transferase domain containing 1 (PRTFDC1), mRNA [NM_020200]	515	0.4911	-1.02591	955	0.91068	-0.134984	992	0.945963	-0.0801441	4154	3.96122	1.98595	1448	1.3808	0.465505	6979	6.65512	2.73446	2121	2.02257	1.01619	668	0.636999	-0.650636	357	0.340432	-1.55456
A_33_P3229918	PTCRA	Homo sapiens pre T-cell antigen receptor alpha (PTCRA), mRNA [NM_138296]	6521	8.57274	3.09976	12200	16.0386	4.00347	6075	7.98642	2.99755	17925	23.5649	4.55856	3427	4.50526	2.17161	67869	89.223	6.47934	758	0.996494	-0.00506654	785	1.03199	0.0454283	739	0.971516	-0.04169
A_23_P216966	PTGS1	Homo sapiens prostaglandin-endoperoxide synthase 1 (prostaglandin G/H synthase and cyclooxygenase) (PTGS1), transcript variant 1, mRNA [NM_000962]	671	1.72346	0.785307	1412	3.62671	1.85866	1430	3.67295	1.87694	5546	14.2449	3.83237	2062	5.29623	2.40497	16095	41.3399	5.36946	193	0.495719	-1.01241	621	1.59503	0.673587	354	0.909247	-0.137257
A_23_P83175	PTPLAD2	Homo sapiens protein tyrosine phosphatase-like A domain containing 2 (PTPLAD2), mRNA [NM_001010915]	2051	2.37201	1.24611	4764	5.50964	2.46196	1586	1.83423	0.875177	5224	6.04163	2.59494	2443	2.82537	1.49844	8938	10.3369	3.36974	328	0.379337	-1.39845	517	0.597918	-0.74198	1749	2.02274	1.01631
A_24_P391260	PTTG1IP	Homo sapiens pituitary tumor-transforming 1 interacting protein (PTTG1IP), mRNA [NM_004339]	4401	1.36719	0.451219	6557	2.03697	1.02642	4669	1.45045	0.536501	8760	2.72134	1.44432	9840	3.05685	1.61205	14023	4.35632	2.12311	2503	0.777571	-0.362954	2297	0.713576	-0.486862	4857	1.50885	0.593453
A_23_P67748	RAB11B	Homo sapiens RAB11B, member RAS oncogene family (RAB11B), mRNA [NM_004218]	3134	1.03217	0.045675	4968	1.63618	0.710335	3593	1.18334	0.242859	6665	2.19508	1.13427	7572	2.4938	1.31834	5790	1.90691	0.931233	1490	0.490723	-1.02702	3012	0.991986	-0.0116084	4607	1.51729	0.601497
A_23_P107612	RAB27B	Homo sapiens RAB27B, member RAS oncogene family (RAB27B), mRNA [NM_004163]	4552	2.89998	1.53604	11554	7.3608	2.87986	6259	3.98747	1.99547	7015	4.4691	2.15998	2086	1.32894	0.410281	33237	21.1746	4.40426	1502	0.956891	-0.0635734	1939	1.23529	0.304855	1268	0.807815	-0.307903
A_24_P236799	RAB31	Homo sapiens RAB31, member RAS oncogene family (RAB31), mRNA [NM_006868]	3532	0.902786	-0.147544	3407	0.870836	-0.199527	3224	0.824061	-0.279178	19041	4.86692	2.28301	16100	4.11519	2.04096	23143	5.9154	2.56447	2440	0.623669	-0.681148	4291	1.09679	0.133285	5006	1.27954	0.355629
A_24_P303480	RAB32	Homo sapiens RAB32, member RAS oncogene family (RAB32), mRNA [NM_006834]	790	1.896	0.922959	1221	2.9304	1.5511	418	1.0032	0.00460925	3506	8.4144	3.07286	2379	5.7096	2.51339	7032	16.8768	4.07697	241	0.5784	-0.789861	338	0.8112	-0.30187	671	1.6104	0.687419
A_24_P122682	RAB4A	Homo sapiens RAB4A, member RAS oncogene family (RAB4A), mRNA [NM_004578]	1287	3.16995	1.66446	2380	5.86207	2.55141	1284	3.16256	1.66109	5118	12.6059	3.65603	1124	2.76847	1.46909	6945	17.1059	4.09642	425	1.0468	0.0659831	236	0.581281	-0.782693	557	1.37192	0.456198
A_33_P3312039	RAD23B	Homo sapiens RAD23 homolog B (S. cerevisiae) (RAD23B), mRNA [NM_002874]	5778	0.931785	-0.101931	9766	1.57491	0.655267	5732	0.924367	-0.113462	10350	1.66909	0.739058	18010	2.90437	1.53823	9648	1.55588	0.637729	6138	0.98984	-0.0147322	5483	0.884212	-0.177535	6982	1.12595	0.171139
A_33_P3246318	RBX1	Homo sapiens ring-box 1 (RBX1), mRNA [NM_014248]	12987	0.869044	-0.202498	19912	1.33244	0.414072	18080	1.20985	0.274828	85802	5.74157	2.52144	15925	1.06565	0.091727	69786	4.66983	2.22337	18109	1.21179	0.277141	20164	1.3493	0.432215	6559	0.438905	-1.18802
A_33_P3357470	REPS2	Homo sapiens RALBP1 associated Eps domain containing 2 (REPS2), transcript variant 1, mRNA [NM_004726]	5792	0.897474	-0.156057	11094	1.71902	0.781589	13353	2.06906	1.04897	17682	2.73984	1.45409	17855	2.76664	1.46814	10606	1.64341	0.71669	6253	0.968907	-0.0455705	5986	0.927535	-0.108527	7122	1.10356	0.142163
A_23_P138717	RGS10	Homo sapiens regulator of G-protein signaling 10 (RGS10), transcript variant 1, mRNA [NM_001005339]	9614	2.66365	1.4134	19873	5.506	2.46101	11937	3.30726	1.72564	48087	13.323	3.73584	8403	2.32813	1.21917	57481	15.9257	3.99328	3312	0.917621	-0.12403	3607	0.999354	-0.000932964	3909	1.08303	0.115067
A_23_P302550	RGS18	Homo sapiens regulator of G-protein signaling 18 (RGS18), mRNA [NM_130782]	8322	2.15168	1.10547	19009	4.91485	2.29715	11769	3.04292	1.60546	47984	12.4064	3.63302	5944	1.53684	0.619971	57222	14.795	3.88703	2263	0.585107	-0.773227	6430	1.6625	0.733355	2910	0.752392	-0.410444
A_23_P137434	RNF11	Homo sapiens ring finger protein 11 (RNF11), mRNA [NM_014372]	894	1.60695	0.684325	1119	2.01138	1.00819	1006	1.80827	0.854609	7124	12.8053	3.67867	2962	5.32415	2.41255	13946	25.0677	4.64776	600	1.07849	0.109013	524	0.941881	-0.0863827	545	0.979629	-0.0296933
A_23_P107073	RPA1	Homo sapiens replication protein A1, 70kDa (RPA1), mRNA [NM_002945]	929	1.13895	0.187699	2208	2.70699	1.43669	1176	1.44177	0.527836	13403	16.432	4.03843	1227	1.50429	0.589084	10512	12.8876	3.68791	550	0.674295	-0.568548	1329	1.62934	0.70429	568	0.696363	-0.522089
A_23_P23542	RPAP2	Homo sapiens RNA polymerase II associated protein 2 (RPAP2), mRNA [NM_024813]	1121	0.984485	-0.0225592	2266	1.99005	0.992802	2189	1.92242	0.942926	3042	2.67155	1.41767	1955	1.71692	0.779823	1329	1.16715	0.222996	933	0.819379	-0.287396	1774	1.55796	0.639661	709	0.622658	-0.683488
A_33_P3390335	RSU1	Homo sapiens Ras suppressor protein 1 (RSU1), transcript variant 1, mRNA [NM_012425]	13354	2.13732	1.09581	27856	4.45839	2.15652	27040	4.32778	2.11363	44460	7.11588	2.83104	21539	3.44734	1.78548	75677	12.1122	3.59839	5448	0.871959	-0.197668	8179	1.30906	0.38853	5117	0.818982	-0.288096
A_33_P3362371	RTN3	Homo sapiens reticulon 3 (RTN3), transcript variant 4, mRNA [NM_201430]	13328	1.1603	0.2145	14133	1.23038	0.299108	11595	1.00943	0.0135426	36462	3.17429	1.66643	47453	4.13114	2.04654	50337	4.38221	2.13166	3658	0.318456	-1.65083	13596	1.18363	0.243222	17206	1.49791	0.582952
A_33_P3253799	RUFY1	Homo sapiens RUN and FYVE domain containing 1 (RUFY1), transcript variant 1, mRNA [NM_025158]	4047	3.50693	1.81021	3230	2.79896	1.48489	9488	8.22184	3.03946	14045	12.1707	3.60534	3852	3.33795	1.73896	57895	50.169	5.64872	850	0.736568	-0.441108	1288	1.11612	0.158489	1324	1.14731	0.19826
A_23_P1926	SDHAF2	Homo sapiens succinate dehydrogenase complex assembly factor 2 (SDHAF2), mRNA [NM_017841]	2502	1.35097	0.433998	3983	2.15065	1.10477	3351	1.8094	0.855508	6772	3.65659	1.8705	4443	2.39903	1.26245	3826	2.06587	1.04675	980	0.529158	-0.91823	1442	0.778618	-0.361013	3134	1.69222	0.758921
A_33_P3339100	SELP	Homo sapiens selectin P (granule membrane protein 140kDa, antigen CD62) (SELP), mRNA [NM_003005]	1382	2.33577	1.2239	3485	5.89014	2.5583	2465	4.1662	2.05873	4841	8.18197	3.03245	2131	3.60169	1.84867	22775	38.493	5.26652	552	0.932958	-0.100116	697	1.17803	0.236374	526	0.889014	-0.169722
A_33_P3329686	SEPT5	Homo sapiens septin 5 (SEPT5), mRNA [NM_002688]	4398	4.90301	2.29367	10420	11.6165	3.5381	7503	8.36455	3.06429	16425	18.311	4.19464	6632	7.39353	2.88626	62777	69.9855	6.12898	832	0.927536	-0.108524	597	0.665552	-0.587377	1262	1.40691	0.492532
A_33_P3243554	SEPT6	Homo sapiens septin 6 (SEPT6), transcript variant V, mRNA [NM_145802]	1887	1.15578	0.208864	3473	2.12719	1.08895	2994	1.83381	0.874844	8207	5.02675	2.32962	2410	1.47611	0.561803	7243	4.4363	2.14936	831	0.508983	-0.97431	2479	1.51837	0.602528	1588	0.972642	-0.0400194
A_33_P3287028	SEPT7	Homo sapiens septin 7 (SEPT7), transcript variant 1, mRNA [NM_001788]	3793	0.583509	-0.777174	9512	1.46331	0.549235	5046	0.776268	-0.365373	31078	4.78099	2.25731	10965	1.68684	0.75432	16903	2.60033	1.37869	6730	1.03533	0.0500928	10204	1.56977	0.650549	2567	0.394903	-1.34043
A_23_P106299	SERF2	Homo sapiens small EDRK-rich factor 2 (SERF2), mRNA [NM_001018108]	42911	1.25404	0.326578	62636	1.83048	0.872223	54065	1.58	0.659925	141731	4.14196	2.05031	74046	2.16393	1.11365	136966	4.00271	2.00098	34438	1.00642	0.00923187	39689	1.15988	0.21397	28528	0.833705	-0.262391
A_23_P435501	SERINC3	Homo sapiens serine incorporator 3 (SERINC3), transcript variant 2, mRNA [NM_198941]	14760	0.920793	-0.119052	21586	1.34663	0.429352	15027	0.937449	-0.0931874	78709	4.91021	2.29578	72779	4.54027	2.18278	69910	4.36129	2.12475	16184	1.00963	0.0138238	17013	1.06134	0.0858931	14892	0.929027	-0.106207
A_23_P148297	SH3BGRL	Homo sapiens SH3 domain binding glutamic acid-rich protein like (SH3BGRL), mRNA [NM_003022]	3257	1.25899	0.332264	8993	3.47623	1.79752	5401	2.08775	1.06195	18037	6.97217	2.80161	3692	1.42714	0.513122	23459	9.06803	3.18079	1450	0.560495	-0.835227	4243	1.64012	0.713805	2068	0.799382	-0.323044
A_33_P3343316	SH3BGRL2	Homo sapiens SH3 domain binding glutamic acid-rich protein like 2 (SH3BGRL2), mRNA [NM_031469]	989	2.70959	1.43807	2004	5.49041	2.45691	1809	4.95616	2.30922	12664	34.6959	5.11669	1699	4.65479	2.21872	22831	62.5507	5.96695	216	0.591781	-0.756865	539	1.47671	0.562389	340	0.931507	-0.102362
A_23_P126388	SH3BGRL3	Homo sapiens SH3 domain binding glutamic acid-rich protein like 3 (SH3BGRL3), mRNA [NM_031286]	9538	1.43616	0.522214	16507	2.48549	1.31353	19919	2.99925	1.5846	60721	9.14289	3.19265	23614	3.55561	1.8301	74361	11.1967	3.485	5663	0.85269	-0.229906	6798	1.02359	0.0336375	7463	1.12372	0.168283
A_33_P3358342	SIAH2	Homo sapiens seven in absentia homolog 2 (Drosophila) (SIAH2), mRNA [NM_005067]	1565	1.03574	0.050659	2147	1.42091	0.506819	1256	0.831238	-0.266667	8522	5.63997	2.49569	3409	2.25612	1.17384	18326	12.1284	3.60032	1035	0.684977	-0.545873	2333	1.54401	0.626683	1165	0.771013	-0.375174
A_24_P566701	SKP1	Homo sapiens S-phase kinase-associated protein 1 (SKP1), transcript variant 2, mRNA [NM_170679]	3649	0.752009	-0.411178	12338	2.54269	1.34636	7934	1.63509	0.70937	22655	4.66889	2.22308	9103	1.876	0.907663	20213	4.16562	2.05853	4093	0.843512	-0.24552	7245	1.4931	0.578307	3219	0.663392	-0.592066
A_33_P3222892	SLC10A3	Homo sapiens solute carrier family 10 (sodium/bile acid cotransporter family), member 3 (SLC10A3), transcript variant 1, mRNA [NM_019848]	723	1.62472	0.70019	659	1.4809	0.566473	361	0.811236	-0.301806	2395	5.38202	2.42815	1619	3.6382	1.86323	6864	15.4247	3.94717	232	0.521348	-0.939681	578	1.29888	0.377264	525	1.17978	0.238512
A_23_P79978	SLC24A3	Homo sapiens solute carrier family 24 (sodium/potassium/calcium exchanger), member 3 (SLC24A3), mRNA [NM_020689]	275	1.32	0.400538	555	2.664	1.41359	536	2.5728	1.36334	1545	7.416	2.89064	1273	6.1104	2.61127	8381	40.2288	5.33016	235	1.128	0.173767	203	0.9744	-0.037414	187	0.8976	-0.155855
A_24_P382467	SLC39A3	Homo sapiens solute carrier family 39 (zinc transporter), member 3 (SLC39A3), transcript variant 1, mRNA [NM_144564]	1228	1.27298	0.348208	2954	3.0622	1.61457	2569	2.6631	1.4131	7070	7.32896	2.87361	2143	2.22149	1.15153	10534	10.9198	3.44888	693	0.718383	-0.477175	938	0.972357	-0.0404426	1263	1.30926	0.388752
A_23_P102731	SMOX	Homo sapiens spermine oxidase (SMOX), transcript variant 1, mRNA [NM_175839]	2085	4.27546	2.09608	7057	14.471	3.85509	4935	10.1196	3.33908	11469	23.5181	4.5557	3784	7.7594	2.95594	31094	63.7608	5.9946	571	1.17088	0.227595	544	1.11552	0.157711	348	0.713602	-0.486808
A_33_P3305974	SNAP23	Homo sapiens synaptosomal-associated protein, 23kDa (SNAP23), transcript variant 1, mRNA [NM_003825]	1561	0.916438	-0.12589	3333	1.95675	0.968461	1760	1.03327	0.0472146	5816	3.41448	1.77167	3045	1.78767	0.838081	5318	3.12211	1.64252	1531	0.898826	-0.153887	1864	1.09432	0.130041	1715	1.00685	0.00984779
A_23_P29939	SNCA	Homo sapiens synuclein, alpha (non A4 component of amyloid precursor) (SNCA), transcript variant 4, mRNA [NM_007308]	2102	1.51114	0.59564	4951	3.55931	1.8316	2919	2.09849	1.06935	9718	6.98634	2.80454	2926	2.10352	1.07281	10776	7.74694	2.95363	2738	1.96837	0.977	848	0.609633	-0.713986	587	0.421999	-1.24469
A_23_P77066	SNRPN	Homo sapiens small nuclear ribonucleoprotein polypeptide N (SNRPN), transcript variant 4, mRNA [NM_022807]	519	0.785967	-0.34746	1409	2.13377	1.09341	994	1.5053	0.590051	4879	7.38869	2.88532	967	1.46441	0.550321	5199	7.8733	2.97697	195	0.295305	-1.75972	1372	2.07774	1.05501	414	0.626956	-0.673564
A_24_P277807	SNX3	Homo sapiens sorting nexin 3 (SNX3), transcript variant 1, mRNA [NM_003795]	5910	0.914955	-0.128227	10556	1.63422	0.708606	5103	0.79002	-0.34004	24709	3.82532	1.93558	15941	2.4679	1.30328	20645	3.19615	1.67634	4915	0.760914	-0.394194	8089	1.2523	0.324576	6374	0.986789	-0.0191863
A_23_P349928	SP100	Homo sapiens SP100 nuclear antigen (SP100), transcript variant 2, mRNA [NM_003113]	3459	0.574171	-0.800447	5804	0.963426	-0.0537541	4640	0.77021	-0.376677	24484	4.06418	2.02297	10033	1.66541	0.73588	14970	2.48492	1.3132	8784	1.45809	0.544076	4922	0.81702	-0.291557	4367	0.724893	-0.464159
A_33_P3382924	SPARC	Homo sapiens secreted protein, acidic, cysteine-rich (osteonectin) (SPARC), mRNA [NM_003118]	318	1.0247	0.0352081	2530	8.15252	3.02725	1066	3.43502	1.78032	7845	25.2793	4.65988	1469	4.73362	2.24294	15361	49.4984	5.62931	331	1.0666	0.0930125	366	1.17938	0.238025	234	0.754028	-0.40731
A_23_P217938	SPHAR	Homo sapiens S-phase response (cyclin related) (SPHAR), mRNA [NM_006542]	382	0.486005	-1.04096	678	0.862595	-0.213244	698	0.888041	-0.171302	4676	5.94911	2.57267	1251	1.5916	0.670481	2871	3.65267	1.86895	1195	1.52036	0.604409	754	0.959288	-0.0599648	409	0.520356	-0.942428
A_23_P429425	ST6GAL2	Homo sapiens ST6 beta-galactosamide alpha-2,6-sialyltranferase 2 (ST6GAL2), transcript variant 1, mRNA [NM_032528]	1930	2.04594	1.03276	3862	4.09399	2.03351	6311	6.69011	2.74203	13357	14.1594	3.82368	1230	1.30389	0.382819	3062	3.24594	1.69863	628	0.665724	-0.587003	1398	1.48198	0.567525	804	0.852297	-0.230572
A_23_P215735	ST7	Homo sapiens suppression of tumorigenicity 7 (ST7), transcript variant a, mRNA [NM_018412]	330	1.46018	0.546143	653	2.88938	1.53076	382	1.69027	0.75725	1404	6.21239	2.63515	418	1.84956	0.88718	2408	10.6549	3.41344	250	1.10619	0.145605	238	1.0531	0.0746388	190	0.840708	-0.250323
A_24_P141214	STOM	Homo sapiens stomatin (STOM), transcript variant 2, mRNA [NM_198194]	2101	2.48737	1.31462	4801	5.6839	2.50688	1863	2.2056	1.14117	15035	17.7999	4.1538	6075	7.19219	2.84643	41571	49.2159	5.62105	676	0.800316	-0.321359	687	0.813339	-0.298072	1171	1.38635	0.471287
A_23_P309837	STON2	Homo sapiens stonin 2 (STON2), mRNA [NM_033104]	3728	3.70454	1.88929	7273	7.22723	2.85344	2898	2.87976	1.52595	6277	6.2375	2.64097	2562	2.54588	1.34816	20860	20.7287	4.37356	1117	1.10997	0.150521	757	0.752236	-0.410743	1145	1.13779	0.186239
A_33_P3319760	TAGLN2	Homo sapiens transgelin 2 (TAGLN2), mRNA [NM_003564]	45001	1.05358	0.0753043	39040	0.914022	-0.1297	35148	0.8229	-0.28121	98302	2.30149	1.20257	93171	2.18136	1.12523	164568	3.85294	1.94596	16775	0.392744	-1.34834	51754	1.21169	0.277018	59608	1.39557	0.480853
A_23_P38468	TAX1BP3	Homo sapiens Tax1 (human T-cell leukemia virus type I) binding protein 3 (TAX1BP3), mRNA [NM_014604]	1928	1.8822	0.91242	3475	3.39245	1.76233	1471	1.43606	0.522112	8063	7.87146	2.97663	3260	3.18256	1.67019	9993	9.75561	3.28623	1073	1.04751	0.0669648	394	0.38464	-1.37842	1606	1.56785	0.648787
A_33_P3380682	TBPL1	Homo sapiens TBP-like 1 (TBPL1), mRNA [NM_004865]	499	1.47633	0.562017	1049	3.10355	1.63392	346	1.02367	0.0337488	1343	3.97337	1.99036	1103	3.26331	1.70634	1501	4.44083	2.15083	184	0.544379	-0.877317	532	1.57396	0.654403	298	0.881657	-0.181711
A_23_P355471	TBXA2R	Homo sapiens thromboxane A2 receptor (TBXA2R), transcript variant b, mRNA [NM_201636]	1106	1.74265	0.80128	2168	3.41597	1.77229	781	1.23057	0.299323	3141	4.94905	2.30715	1223	1.927	0.946353	10545	16.615	4.05442	780	1.22899	0.297475	702	1.10609	0.145472	422	0.664916	-0.588756
A_24_P79054	TGFB1	Homo sapiens transforming growth factor, beta 1 (TGFB1), mRNA [NM_000660]	7387	1.74799	0.805696	9374	2.21817	1.14937	7983	1.88902	0.917638	13166	3.11548	1.63945	18942	4.48225	2.16422	49025	11.6008	3.53615	2252	0.532892	-0.908086	1944	0.460009	-1.12026	8482	2.0071	1.00511
A_33_P3415820	THBS1	Homo sapiens thrombospondin 1 (THBS1), mRNA [NM_003246]	2238	1.11454	0.156451	4290	2.13645	1.09522	3754	1.86952	0.902669	5281	2.62998	1.39505	4175	2.07918	1.05602	20512	10.2151	3.35264	3627	1.80627	0.853017	1505	0.749502	-0.415996	892	0.444223	-1.17064
A_33_P3353948	THC2526367	Q8NCT2_HUMAN (Q8NCT2) CDC14C protein (Fragment), complete [THC2526367]	3154	0.995686	-0.00623787	7438	2.3481	1.23149	7646	2.41376	1.27128	17780	5.61296	2.48876	5515	1.74103	0.79994	20161	6.36462	2.67007	7195	2.27139	1.18357	1269	0.40061	-1.31973	1039	0.328002	-1.60822
A_33_P3281358	THC2574518	BC075924 zgc:92190 {Danio rerio} (exp=-1; wgp=0; cg=0), partial (22%) [THC2574518]	861	2.28787	1.194	3016	8.01417	3.00255	1950	5.18158	2.37339	6562	17.4367	4.12405	2866	7.61559	2.92896	16741	44.4845	5.47523	402	1.0682	0.0951844	285	0.757307	-0.401049	442	1.17449	0.232035
A_32_P144220	THC2582201	Q13182_HUMAN (Q13182) Myosin regulatory light chain MRCL2 (Nonmuscle myosin light chain 2), partial (90%) [THC2582201]	5381	0.952221	-0.0706319	13186	2.33339	1.22243	9821	1.73792	0.797364	26972	4.77296	2.25488	11680	2.06689	1.04746	23382	4.13767	2.04882	3665	0.648558	-0.624693	7371	1.30437	0.383354	5917	1.04707	0.0663597
A_33_P3311663	THC2664472	Unknown	702	1.50429	0.589079	2105	4.51071	2.17336	1011	2.16643	1.11532	1482	3.17571	1.66708	852	1.82571	0.868461	2757	5.90786	2.56263	769	1.64786	0.720591	408	0.874286	-0.193823	223	0.477857	-1.06535
A_33_P3407606	THC2725860	Q275K3_MYCFV (Q275K3) Phage integrase, partial (4%) [THC2725860]	2618	2.72047	1.44386	7723	8.02529	3.00455	10837	11.2612	3.49328	35056	36.4281	5.18698	4211	4.37582	2.12955	27869	28.9598	4.85598	915	0.950814	-0.072765	1001	1.04018	0.0568334	971	1.00901	0.0129346
A_33_P3270826	THEM5	Homo sapiens thioesterase superfamily member 5 (THEM5), mRNA [NM_182578]	637	1.48254	0.568076	1735	4.03801	2.01365	1383	3.21877	1.68651	4039	9.40031	3.23271	594	1.38247	0.467245	5230	12.1722	3.60552	638	1.48487	0.570339	335	0.779674	-0.359057	316	0.735454	-0.443293
A_23_P62115	TIMP1	Homo sapiens TIMP metallopeptidase inhibitor 1 (TIMP1), mRNA [NM_003254]	7333	2.14436	1.10055	15577	4.55512	2.18749	13874	4.05712	2.02046	46180	13.5042	3.75534	15815	4.62472	2.20937	46205	13.5116	3.75612	3585	1.04835	0.0681174	1401	0.409689	-1.2874	5273	1.54196	0.624768
A_24_P282762	TLK1	Homo sapiens tousled-like kinase 1 (TLK1), transcript variant 1, mRNA [NM_012290]	2288	1.53248	0.615873	3851	2.57937	1.36702	2694	1.80442	0.851536	5621	3.7649	1.91261	3910	2.61889	1.38895	11812	7.91159	2.98397	1189	0.796383	-0.328465	2201	1.47421	0.559945	1089	0.729404	-0.45521
A_24_P196851	TLN1	Homo sapiens talin 1 (TLN1), mRNA [NM_006289]	13442	0.914214	-0.129395	19037	1.29474	0.372663	14007	0.952641	-0.0699953	37256	2.53385	1.34133	59591	4.05289	2.01895	97985	6.66414	2.73642	9319	0.633802	-0.657896	14859	1.01059	0.0151938	19932	1.35561	0.438943
A_23_P69226	TMEM111	Homo sapiens transmembrane protein 111 (TMEM111), mRNA [NM_018447]	3598	0.906678	-0.141338	16081	4.05233	2.01875	9790	2.46703	1.30278	43479	10.9565	3.45371	4955	1.24864	0.320352	42609	10.7373	3.42455	4680	1.17934	0.237975	5356	1.34969	0.432623	1869	0.470979	-1.08627
A_24_P372134	TMEM140	Homo sapiens transmembrane protein 140 (TMEM140), mRNA [NM_018295]	1035	1.02172	0.0309966	2480	2.44817	1.29171	2375	2.34452	1.22929	5190	5.1234	2.3571	3551	3.50543	1.80959	8732	8.61994	3.10768	281	0.277394	-1.84999	719	0.709773	-0.49457	2039	2.01283	1.00923
A_23_P406131	TMEM159	Homo sapiens transmembrane protein 159 (TMEM159), mRNA [NM_020422]	937	0.951591	-0.0715864	1599	1.6239	0.699463	521	0.529113	-0.918352	6196	6.29248	2.65363	1972	2.00271	1.00195	3849	3.90894	1.96678	694	0.704807	-0.5047	1362	1.38321	0.468019	898	0.911984	-0.13292
A_33_P3423740	TMEM164	Homo sapiens transmembrane protein 164 (TMEM164), transcript variant 2, mRNA [NM_032227]	1690	1.70248	0.767642	2500	2.51847	1.33255	1309	1.31867	0.399084	3637	3.66387	1.87337	2713	2.73304	1.45051	4291	4.3227	2.11193	590	0.594359	-0.750594	758	0.7636	-0.389111	1630	1.64204	0.715491
A_24_P43391	TMEM165	Homo sapiens transmembrane protein 165 (TMEM165), mRNA [NM_018475]	609	1.23529	0.304855	1621	3.28803	1.71722	1212	2.45842	1.29773	5871	11.9087	3.57395	1528	3.09939	1.63198	1529	3.10142	1.63293	419	0.849899	-0.234637	623	1.26369	0.337645	437	0.88641	-0.173954
A_33_P3391418	TMEM40	Homo sapiens transmembrane protein 40 (TMEM40), mRNA [NM_018306]	1137	1.46647	0.552344	4870	6.28117	2.65103	2309	2.97807	1.57438	7000	9.02837	3.17447	1439	1.85598	0.892178	12667	16.3375	4.03011	1507	1.94368	0.958791	275	0.354686	-1.49539	544	0.701634	-0.51121
A_33_P3363620	TMEM91	Homo sapiens transmembrane protein 91 (TMEM91), transcript variant 5, mRNA [NM_001098824]	2102	0.84667	-0.240128	3909	1.57452	0.654909	4859	1.95717	0.968769	10517	4.23617	2.08276	10697	4.30867	2.10724	13985	5.63306	2.49392	2707	1.09036	0.124804	2283	0.919576	-0.12096	2458	0.990064	-0.0144057
A_24_P143189	TMSL3	Homo sapiens thymosin-like 3 (TMSL3), mRNA [NM_183049]	75825	1.00995	0.0142898	79997	1.06552	0.0915621	78052	1.03962	0.0560518	215431	2.86944	1.52077	156091	2.07906	1.05593	228867	3.0484	1.60805	77897	1.03755	0.053184	83354	1.11024	0.150868	63982	0.852211	-0.230718
A_23_P131825	TNNC2	Homo sapiens troponin C type 2 (fast) (TNNC2), mRNA [NM_003279]	1738	2.51035	1.32789	3470	5.01204	2.3254	4855	7.01252	2.80993	5573	8.04959	3.00892	1313	1.89649	0.923328	8326	12.026	3.58808	706	1.01974	0.0282014	778	1.12374	0.168303	593	0.856524	-0.223435
A_23_P156708	TNXB	Homo sapiens tenascin XB (TNXB), transcript variant XB-S, mRNA [NM_032470]	1164	0.779812	-0.358801	2429	1.62729	0.70247	1408	0.943278	-0.0842447	5913	3.96137	1.986	2598	1.74051	0.799509	2019	1.35261	0.435749	2023	1.35529	0.438604	993	0.665252	-0.588026	1462	0.979455	-0.0299487
A_23_P206018	TPM1	Homo sapiens tropomyosin 1 (alpha) (TPM1), transcript variant 3, mRNA [NM_001018004]	1445	0.608677	-0.71625	9128	3.84499	1.94298	4817	2.02906	1.02081	26301	11.0788	3.46973	7517	3.16639	1.66284	28522	12.0143	3.58668	3716	1.56529	0.646431	1992	0.83909	-0.253102	1414	0.595619	-0.747538
A_23_P141974	TPM4	Homo sapiens tropomyosin 4 (TPM4), transcript variant 2, mRNA [NM_003290]	8481	1.35098	0.434006	13676	2.17852	1.12335	7567	1.20538	0.269493	21658	3.45001	1.7866	20726	3.30155	1.72314	79687	12.6937	3.66604	6559	1.04481	0.0632474	3993	0.636064	-0.652755	8281	1.31912	0.399577
A_33_P3304754	TPP2	Homo sapiens tripeptidyl peptidase II, mRNA (cDNA clone IMAGE:4508093), with apparent retained intron. [BC024905]	572	1.41935	0.505235	1899	4.71216	2.23639	897	2.22581	1.15433	10018	24.8586	4.63567	784	1.94541	0.960074	2679	6.64764	2.73284	435	1.0794	0.110236	494	1.22581	0.293731	280	0.694789	-0.525353
A_23_P132226	TPST2	Homo sapiens tyrosylprotein sulfotransferase 2 (TPST2), transcript variant 1, mRNA [NM_001008566]	824	1.22741	0.295615	1783	2.65591	1.40921	937	1.39573	0.48102	2980	4.43893	2.15021	3347	4.9856	2.31777	14559	21.6867	4.43874	665	0.990566	-0.0136749	692	1.03078	0.0437428	657	0.978649	-0.0311359
A_33_P3247392	TPTE	Homo sapiens transmembrane phosphatase with tensin homology (TPTE), transcript variant 1, mRNA [NM_199261]	3051	1.50419	0.588987	3069	1.51306	0.597474	11147	5.49565	2.45829	19658	9.6917	3.27675	2356	1.16154	0.216045	6032	2.97387	1.57234	2308	1.13788	0.186348	2852	1.40608	0.491679	925	0.456039	-1.13277
A_23_P125348	TRAPPC1	Homo sapiens trafficking protein particle complex 1 (TRAPPC1), transcript variant 1, mRNA [NM_021210]	22270	1.55379	0.635795	38590	2.69245	1.42892	35626	2.48565	1.31362	115937	8.089	3.01596	46166	3.22103	1.68752	97230	6.7838	2.76209	11687	0.81541	-0.294402	14842	1.03554	0.0503785	16469	1.14905	0.200446
A_33_P3381777	TREML1	Homo sapiens triggering receptor expressed on myeloid cells-like 1 (TREML1), mRNA [NM_178174]	5389	4.75081	2.24817	16667	14.6932	3.87708	12858	11.3353	3.50275	32090	28.2897	4.82221	10837	9.55363	3.25605	106442	93.8366	6.55208	1080	0.952101	-0.0708133	841	0.741405	-0.431667	1482	1.30649	0.385701
A_33_P3249414	TRIM58	Homo sapiens tripartite motif-containing 58 (TRIM58), mRNA [NM_015431]	3262	3.42767	1.77723	7843	8.24133	3.04288	5406	5.68056	2.50603	26784	28.1443	4.81477	5036	5.29177	2.40375	61198	64.3061	6.00688	1360	1.42907	0.515078	1138	1.1958	0.257972	357	0.375131	-1.41453
A_33_P3296205	TSC22D1	Homo sapiens TSC22 domain family, member 1 (TSC22D1), transcript variant 1, mRNA [NM_183422]	4989	2.87882	1.52548	12457	7.18811	2.84561	6446	3.71956	1.89513	53921	31.1143	4.9595	5293	3.05424	1.61081	96964	55.9515	5.80611	1700	0.980958	-0.0277369	2905	1.67628	0.745267	594	0.342758	-1.54474
A_24_P13083	TSPAN18	Homo sapiens tetraspanin 18 (TSPAN18), mRNA [NM_130783]	733	1.35323	0.436408	1131	2.088	1.06212	1065	1.96615	0.975376	1962	3.62215	1.85685	716	1.32185	0.402554	8277	15.2806	3.93363	684	1.26277	0.336591	637	1.176	0.233888	304	0.561231	-0.833334
A_24_P365901	TSPAN33	Homo sapiens tetraspanin 33 (TSPAN33), mRNA [NM_178562]	10327	0.946678	-0.0790536	15978	1.46471	0.550612	11476	1.05201	0.0731451	33387	3.06059	1.61381	10901	0.999297	-0.00101429	89021	8.16058	3.02867	12668	1.16128	0.215714	16795	1.5396	0.622557	3263	0.29912	-1.7412
A_23_P128598	TUBA3C	Homo sapiens tubulin, alpha 3c (TUBA3C), mRNA [NM_006001]	4113	2.0358	1.0256	9954	4.92691	2.30068	9227	4.56707	2.19127	11347	5.6164	2.48965	9655	4.77891	2.25668	36134	17.8852	4.16069	1783	0.882528	-0.180287	2491	1.23296	0.302132	1787	0.884508	-0.177054
A_23_P84448	TUBA4A	Homo sapiens tubulin, alpha 4a (TUBA4A), mRNA [NM_006000]	5162	1.73047	0.791166	11598	3.88803	1.95904	9527	3.19376	1.67526	16200	5.43077	2.44116	12793	4.28864	2.10052	46374	15.5461	3.95848	2662	0.89239	-0.164253	3342	1.12035	0.163948	2945	0.987261	-0.0184963
A_24_P160104	TUBA8	Homo sapiens tubulin, alpha 8 (TUBA8), mRNA [NM_018943]	7410	4.68197	2.22712	10631	6.71714	2.74785	10228	6.46251	2.69209	29197	18.448	4.20539	8015	5.06424	2.34035	53792	33.9882	5.08696	1705	1.0773	0.107414	1658	1.0476	0.0670866	1385	0.875105	-0.192471
A_24_P228550	TUBB1	Homo sapiens tubulin, beta 1 (TUBB1), mRNA [NM_030773]	9511	3.50657	1.81006	23656	8.72164	3.1246	18268	6.73516	2.75171	68949	25.4205	4.66792	13352	4.9227	2.29945	139785	51.5368	5.68753	2470	0.910655	-0.135023	3785	1.39548	0.480759	1882	0.693868	-0.527268
A_33_P3365002	TUBB2A	Homo sapiens tubulin, beta 2A (TUBB2A), mRNA [NM_001069]	10556	2.37142	1.24575	18385	4.13022	2.04622	16425	3.68991	1.88358	43036	9.66811	3.27323	11298	2.53812	1.34376	98198	22.0604	4.46338	6566	1.47506	0.560777	4364	0.98038	-0.0285864	2424	0.544556	-0.876848
A_23_P312863	TUBB2C	Homo sapiens tubulin, beta 2C (TUBB2C), mRNA [NM_006088]	954	1.07312	0.101806	1038	1.1676	0.223551	556	0.625422	-0.677099	2004	2.25422	1.17263	2194	2.46794	1.30331	5203	5.85264	2.54909	398	0.447694	-1.15941	1212	1.36333	0.447134	1057	1.18898	0.24972
A_24_P297539	UBE2C	Homo sapiens ubiquitin-conjugating enzyme E2C (UBE2C), transcript variant 6, mRNA [NM_181803]	783	2.72506	1.44629	542	1.88631	0.915567	348	1.21114	0.276362	2620	9.11833	3.18877	1433	4.98724	2.31824	3105	10.8063	3.4338	323	1.12413	0.168809	210	0.730858	-0.452336	329	1.14501	0.195362
A_23_P39561	UBE2F	Homo sapiens ubiquitin-conjugating enzyme E2F (putative) (UBE2F), mRNA [NM_080678]	3141	1.09138	0.126157	5453	1.89472	0.921984	5106	1.77415	0.827127	11272	3.91661	1.96961	4313	1.49861	0.583625	6419	2.23037	1.15728	3390	1.1779	0.236219	4340	1.50799	0.592628	904	0.314107	-1.67067
A_33_P3341234	UBE2H	Homo sapiens ubiquitin-conjugating enzyme E2H (UBC8 homolog, yeast) (UBE2H), transcript variant 1, mRNA [NM_003344]	1944	0.774399	-0.368851	2528	1.00704	0.0101175	1795	0.715044	-0.483895	14203	5.65781	2.50024	8283	3.29956	1.72227	19231	7.66074	2.93748	3418	1.36157	0.445273	1961	0.781171	-0.356289	2152	0.857257	-0.222201
A_24_P286013	UBE2K	Homo sapiens ubiquitin-conjugating enzyme E2K (UBC1 homolog, yeast) (UBE2K), transcript variant 1, mRNA [NM_005339]	1964	0.934645	-0.0975101	3245	1.54426	0.626913	1478	0.703363	-0.507659	8106	3.85755	1.94769	3860	1.83693	0.877296	6773	3.22319	1.68849	1370	0.651967	-0.617129	3534	1.68179	0.749997	1400	0.666244	-0.585878
A_24_P816384	UBE2Q2P1	Homo sapiens ubiquitin-conjugating enzyme E2Q family member 2 pseudogene 1 (UBE2Q2P1), non-coding RNA [NR_003661]	613	0.747257	-0.420323	1921	2.34173	1.22758	1567	1.9102	0.933723	1972	2.4039	1.26538	1265	1.54206	0.624855	2429	2.96099	1.56608	1376	1.67737	0.746198	631	0.7692	-0.37857	454	0.553434	-0.853518
A_33_P3336233	UBL4A	Homo sapiens ubiquitin-like 4A (UBL4A), mRNA [NM_014235]	669	1.65049	0.722897	2378	5.86678	2.55257	1317	3.24918	1.70007	2102	5.18586	2.37458	750	1.85033	0.887782	6345	15.6538	3.96844	193	0.476151	-1.07051	590	1.45559	0.541606	433	1.06826	0.0952582
A_33_P3279715	UHRF2	Homo sapiens ubiquitin-like with PHD and ring finger domains 2 (UHRF2), mRNA [NM_152896]	735	1.29935	0.377792	1776	3.13966	1.65061	1417	2.50501	1.32482	1938	3.42605	1.77654	878	1.55215	0.634269	1672	2.9558	1.56355	465	0.822039	-0.282721	543	0.959929	-0.059	689	1.21803	0.284552
A_24_P405190	USP33	Homo sapiens ubiquitin specific peptidase 33 (USP33), transcript variant 3, mRNA [NM_201626]	2406	1.14626	0.196934	4999	2.38161	1.25194	4903	2.33587	1.22396	11569	5.51167	2.46249	4065	1.93664	0.953553	4668	2.22392	1.1531	1306	0.622201	-0.684547	3499	1.66698	0.73724	1492	0.710815	-0.492455
A_24_P47182	VCL	Homo sapiens vinculin (VCL), transcript variant 1, mRNA [NM_014000]	3420	1.25	0.321928	10207	3.73063	1.89942	7496	2.73977	1.45405	27885	10.1919	3.34935	10099	3.69115	1.88407	78917	28.8439	4.8502	2545	0.93019	-0.104403	2359	0.862208	-0.213893	3304	1.2076	0.272145
A_24_P235316	VDAC3	Homo sapiens voltage-dependent anion channel 3 (VDAC3), transcript variant 2, mRNA [NM_005662]	2615	0.971276	-0.0420461	5108	1.89724	0.923901	2477	0.92002	-0.120263	12634	4.69258	2.23038	3370	1.2517	0.323892	8424	3.12888	1.64565	2358	0.87582	-0.191293	3436	1.27622	0.351873	2283	0.847963	-0.237926
A_23_P366328	VPS37A	Homo sapiens vacuolar protein sorting 37 homolog A (S. cerevisiae) (VPS37A), transcript variant 1, mRNA [NM_152415]	1446	2.60072	1.37891	2364	4.2518	2.08807	1642	2.95324	1.5623	4591	8.25719	3.04565	1289	2.31835	1.2131	1693	3.04496	1.60643	332	0.597122	-0.743902	483	0.868705	-0.203062	853	1.53417	0.617461
A_33_P3346348	WDR67	Homo sapiens WD repeat domain 67 (WDR67), transcript variant 2, mRNA [NM_001145088]	408	0.626407	-0.674827	783	1.20215	0.265616	1303	2.00051	1.00037	4328	6.64483	2.73223	998	1.53224	0.615644	1229	1.8869	0.916017	576	0.88434	-0.177327	1047	1.60747	0.684793	331	0.508188	-0.976565
A_24_P118489	WHAMM	Homo sapiens WAS protein homolog associated with actin, golgi membranes and microtubules (WHAMM), mRNA [NM_001080435]	1878	1.87675	0.908236	3986	3.98334	1.99398	3118	3.11592	1.63966	7820	7.81479	2.96621	2012	2.01066	1.00767	4383	4.38008	2.13096	794	0.793471	-0.333751	1169	1.16822	0.224313	1039	1.03831	0.0542342
A_23_P53363	XRCC6BP1	Homo sapiens XRCC6 binding protein 1 (XRCC6BP1), mRNA [NM_033276]	2225	2.26195	1.17756	2730	2.77533	1.47266	2171	2.20705	1.14212	3090	3.14131	1.65137	3363	3.41884	1.77351	1177	1.19654	0.258873	746	0.758387	-0.398994	897	0.911894	-0.133062	1308	1.32972	0.411121
A_23_P108835	YPEL5	Homo sapiens yippee-like 5 (Drosophila) (YPEL5), transcript variant 4, mRNA [NM_016061]	1666	0.644487	-0.633776	5951	2.30213	1.20297	2934	1.13501	0.182705	16992	6.57331	2.71662	6761	2.61547	1.38707	10172	3.93501	1.97637	2551	0.986847	-0.0191014	3088	1.19458	0.256508	2116	0.818569	-0.288825
A_24_P33444	YWHAE	Homo sapiens tyrosine 3-monooxygenase/tryptophan 5-monooxygenase activation protein, epsilon polypeptide (YWHAE), transcript variant 1, mRNA [NM_006761]	2320	1.71386	0.777252	6062	4.47821	2.16292	3500	2.58557	1.37048	10558	7.79956	2.96339	2604	1.92366	0.943857	6490	4.79439	2.26135	833	0.615366	-0.700484	1848	1.36518	0.449092	1380	1.01945	0.0277957
A_23_P103070	YWHAH	Homo sapiens tyrosine 3-monooxygenase/tryptophan 5-monooxygenase activation protein, eta polypeptide (YWHAH), mRNA [NM_003405]	5145	1.96449	0.974155	8573	3.27339	1.71078	6104	2.33066	1.22074	22211	8.48072	3.08419	7214	2.75449	1.46178	48741	18.6105	4.21805	1822	0.695685	-0.523493	1850	0.706376	-0.501491	4185	1.59794	0.676212
A_33_P3662553	YWHAQ	Homo sapiens tyrosine 3-monooxygenase/tryptophan 5-monooxygenase activation protein, theta polypeptide (YWHAQ), mRNA [NM_006826]	769	0.550465	-0.861277	2147	1.53686	0.61999	1127	0.806729	-0.309845	5272	3.7738	1.91602	2729	1.95347	0.96604	8235	5.89477	2.55944	1637	1.1718	0.228722	1650	1.1811	0.240134	904	0.647101	-0.627937
A_32_P198923	YWHAZ	Homo sapiens tyrosine 3-monooxygenase/tryptophan 5-monooxygenase activation protein, zeta polypeptide (YWHAZ), transcript variant 2, mRNA [NM_145690]	20649	1.29172	0.369293	28460	1.78034	0.832157	21716	1.35847	0.441979	84322	5.27485	2.39913	31282	1.95688	0.968554	76953	4.81387	2.2672	14387	0.899994	-0.152013	24176	1.51235	0.596797	9394	0.587651	-0.766967
A_23_P336992	ZFAND2A	Homo sapiens zinc finger, AN1-type domain 2A (ZFAND2A), mRNA [NM_182491]	1121	1.17096	0.227693	3049	3.18489	1.67124	1073	1.12082	0.164557	4388	4.58357	2.19647	4223	4.41121	2.14117	2587	2.7023	1.43419	1046	1.09262	0.12779	684	0.714485	-0.485025	1142	1.1929	0.254469
A_32_P143048	ZFYVE9	Homo sapiens zinc finger, FYVE domain containing 9 (ZFYVE9), transcript variant 3, mRNA [NM_004799]	1444	3.74093	1.9034	3501	9.06995	3.18109	3339	8.65026	3.11274	7888	20.4352	4.35299	1152	2.98446	1.57747	3092	8.01036	3.00187	440	1.1399	0.188903	348	0.901554	-0.149514	370	0.958549	-0.0610756
A_23_P147199	ZNF271	Homo sapiens zinc finger protein 271 (ZNF271), transcript variant 1, non-coding RNA [NR_024565]	925	0.656494	-0.607146	3174	2.25266	1.17163	1334	0.946771	-0.0789129	6768	4.80341	2.26406	1888	1.33996	0.422187	8059	5.71966	2.51593	1114	0.790632	-0.338922	2346	1.66501	0.735531	767	0.544358	-0.877373
GENES EXPRESSED MAINLY IN PATIENT SAMPLES
A_24_P16913	ABCC4	Homo sapiens ATP-binding cassette, sub-family C (CFTR/MRP), member 4 (ABCC4), transcript variant 1, mRNA [NM_005845]	386		8.59246	857		9.74315	186		7.53916	1945		10.9256	714		9.47978	2525		11.3021	NA		NA	NA		NA	NA		NA
A_33_P3264089	ACTR3C	Homo sapiens ARP3 actin-related protein 3 homolog C (yeast) (ACTR3C), transcript variant 1, mRNA [NM_001164458]	NA		NA	238		7.89482	NA		NA	228		7.83289	225		7.81378	229		7.8392	NA		NA	NA		NA	NA		NA
A_33_P3263666	ANKRD9	Homo sapiens ankyrin repeat domain 9 (ANKRD9), mRNA [NM_152326]	1293		10.3365	1612		10.6546	1194		10.2216	3724		11.8626	1023		9.99859	6842		12.7402	NA		NA	NA		NA	NA		NA
A_24_P173754	C1orf21	Homo sapiens chromosome 1 open reading frame 21 (C1orf21), mRNA [NM_030806]	NA		NA	195		7.60733	346		8.43463	977		9.93221	241		7.91289	600		9.22882	NA		NA	NA		NA	NA		NA
A_33_P3353210	CADM2	Homo sapiens cell adhesion molecule 2 (CADM2), transcript variant 1, mRNA [NM_001167674]	NA		NA	1589		10.6339	273		8.09276	174		7.44294	572		9.15987	609		9.2503	NA		NA	NA		NA	NA		NA
A_24_P360763	CREM	Homo sapiens cAMP responsive element modulator (CREM), transcript variant 2, mRNA [NM_001881]	NA		NA	210		7.71425	NA		NA	550		9.10329	248		7.9542	466		8.86419	NA		NA	NA		NA	NA		NA
A_24_P396167	CTSW	Homo sapiens cathepsin W (CTSW), mRNA [NM_001335]	451		8.81698	2519		11.2986	2728		11.4136	5875		12.5204	947		9.88722	17339		14.0817	NA		NA	NA		NA	NA		NA
A_23_P364792	CYorf15A	Homo sapiens chromosome Y open reading frame 15A (CYorf15A), mRNA [NM_001005852]	1294		10.3376	1606		10.6493	NA		NA	4413		12.1075	1168		10.1898	1726		10.7532	580		9.17991	NA		NA	NA		NA
A_23_P99906	HOMER2	Homo sapiens homer homolog 2 (Drosophila) (HOMER2), transcript variant 2, mRNA [NM_199330]	276		8.10852	292		8.18982	NA		NA	1850		10.8533	894		9.80413	3666		11.84	NA		NA	NA		NA	NA		NA
A_24_P142151	LRRC28	Homo sapiens leucine rich repeat containing 28 (LRRC28), mRNA [NM_144598]	187		7.54689	275		8.10329	189		7.56224	452		8.82018	651		9.34651	507		8.98584	NA		NA	NA		NA	250		7.96578
A_33_P3234697	LXN	Homo sapiens latexin (LXN), mRNA [NM_020169]	291		8.18488	198		7.62936	NA		NA	1034		10.014	458		8.8392	604		9.2384	NA		NA	NA		NA	431		8.75154
A_33_P3363938	NAP1L4	Homo sapiens cDNA, FLJ79447 complete cds, highly similar to Nucleosome assembly protein 1-like 4. [AK316548]	NA		NA	320		8.32193	NA		NA	489		8.93369	202		7.65821	295		8.20457	NA		NA	NA		NA	NA		NA
A_23_P113701	PDGFA	Homo sapiens platelet-derived growth factor alpha polypeptide (PDGFA), transcript variant 1, mRNA [NM_002607]	273		8.09276	358		8.48382	268		8.06609	745		9.5411	298		8.21917	5656		12.4656	NA		NA	NA		NA	NA		NA
A_24_P250765	PRKG1	Homo sapiens protein kinase, cGMP-dependent, type I (PRKG1), transcript variant 2, mRNA [NM_006258]	NA		NA	320		8.32193	363		8.50383	640		9.32193	345		8.43045	927		9.85643	NA		NA	NA		NA	NA		NA
A_33_P3265749	PTGER3	Homo sapiens prostaglandin E receptor 3 (subtype EP3) (PTGER3), transcript variant 7, mRNA [NM_198717]	217		7.76155	435		8.76487	506		8.98299	831		9.6987	302		8.2384	1172		10.1948	NA		NA	421		8.71768	NA		NA
A_23_P324384	RPS4Y2	Homo sapiens ribosomal protein S4, Y-linked 2 (RPS4Y2), mRNA [NM_001039567]	1366		10.4157	226		7.82018	NA		NA	4605		12.169	3320		11.697	1756		10.7781	3814		11.8971	NA		NA	NA		NA
A_23_P102391	SLC40A1	Homo sapiens solute carrier family 40 (iron-regulated transporter), member 1 (SLC40A1), mRNA [NM_014585]	235		7.87652	338		8.40088	682		9.41363	1871		10.8696	844		9.7211	3247		11.6649	NA		NA	NA		NA	200		7.64386
A_23_P431388	SPOCD1	Homo sapiens SPOC domain containing 1 (SPOCD1), mRNA [NM_144569]	NA		NA	750		9.55075	281		8.13443	1204		10.2336	662		9.37069	8349		13.0274	NA		NA	NA		NA	NA		NA
A_23_P171388	TMSB4Y	Homo sapiens thymosin beta 4, Y-linked (TMSB4Y), mRNA [NM_004202]	NA		NA	610		9.25267	NA		NA	714		9.47978	233		7.86419	1323		10.3696	NA		NA	NA		NA	NA		NA
A_23_P105562	VWF	Homo sapiens von Willebrand factor (VWF), mRNA [NM_000552]	202		7.65821	4611		12.1709	201		7.65105	321		8.32643	530		9.04985	2420		11.2408	NA		NA	220		7.78136	NA		NA
A_23_P34142	WBP5	Homo sapiens WW domain binding protein 5 (WBP5), transcript variant 1, mRNA [NM_016303]	NA		NA	220		7.78136	NA		NA	194		7.59991	177		7.46761	569		9.15228	NA		NA	NA		NA	NA		NA
A_24_P918032	WHAMML1	Homo sapiens WAS protein homolog associated with actin, golgi membranes and microtubules-like 1 (WHAMML1), non-coding RNA [NR_003521]	388		8.59991	1090		10.0901	722		9.49586	4002		11.9665	1050		10.0362	3757		11.8754	NA		NA	NA		NA	NA		NA
A_23_P45304	XK	Homo sapiens X-linked Kx blood group (McLeod syndrome) (XK), mRNA [NM_021083]	1915		10.9031	5386		12.395	1305		10.3498	8335		13.025	1500		10.5507	14979		13.8707	NA		NA	NA		NA	NA		NA
A_23_P113748	ZNF385D	Homo sapiens zinc finger protein 385D (ZNF385D), mRNA [NM_024697]	NA		NA	NA		NA	478		8.90087	1329		10.3761	341		8.41363	788		9.62205	NA		NA	196		7.61471	NA		NA
